# Supplementary material for: A series of temperature-dependent CdII-complexes containing an important family of N-rich heterocycles from in situ conversion of pyridine-type Schiff base
Source: Royal Society of Chemistry journal article supplement (doi:10.1039/c4ra16198j), 2015-01-01
Supplement: c4ra16198j1.pdf [file c4ra16198j1.pdf]

## Supporting Information

### **A series of temperature-dependent Cd<sup>II</sup>-complexes containing an important family of N-rich heterocycles from in situ conversion of pyridine-type Schiff base**

Yan-Jun Ou,<sup>a,b</sup> Yu-Jia Ding,<sup>a</sup> Qin Wei,<sup>a</sup> Xu-Jia Hong,<sup>a</sup> Zhi-Peng Zheng,<sup>a</sup>  
Yu-Hua Long,<sup>a</sup> Yue-Peng Cai\*<sup>a,b</sup> and Xiang-Dong Yao\*<sup>c</sup>

*<sup>a</sup>School of Chemistry and Environment, South China Normal University;*

*Guangzhou Key Laboratory of Materials for Energy Conversion and Storage, Guangzhou  
510006, P.R. China. Fax: +86-020-39310; Tel: +86-020-39310383; E-mail: [caiyp@scnu.edu.cn](mailto:caiyp@scnu.edu.cn)*

*<sup>b</sup>State Key Laboratory of Coordination Chemistry Nanjing University,*

*Hankou Road 22, Nanjing, 210093 P.R.China*

*<sup>c</sup>QLD Micro- and Nanotechnology Centre, Griffith University, Nathan campus,  
Nathan QLD 4111, Australia. E-mail: [x.yao@griffith.edu.au](mailto:x.yao@griffith.edu.au)*

## Content

1. Table S1. Crystal data and structure refinement of compounds **1-9** and **1'-2'**.
2. Table S2. Selected bond lengths and angles for nine compounds **1-9**.
3. Table S3. Distances (Å) and angles (°) of hydrogen bonds for eight compounds **1-8**.
4. Figure S1. Cd<sub>6</sub>Cl<sub>13</sub> unit connected through single or double  $\mu_2$ -bridging Cl atom in **1**.
5. Figure S2. 3-D supramolecular network assembled through intermolecular hydrogen bonds C-H...Cl(O) along *c* axis in **2**.
6. Figure S3. 1-D supramolecular chain constructed by intermolecular hydrogen bonding C-H...Cl interaction along *b* axis in **3**.
7. Figure S4. 1-D chain assembled via Cl<sub>2</sub>...Cd1 weak interaction in ac plane in **4**.
8. Figure S5. 2-D supramolecular layer assembled by intermolecular hydrogen bonding C-H...Cl interaction along *b* axis in **4**.
9. Scheme S1. The molecular structure of ligand **L1'**.
10. Figure S6. Molecular structure of compound **1'** with atomic labels.
11. Figure S7. 2-D supramolecular layer assembled by intermolecular hydrogen bonding C-H...Cl interaction along *c* axis in **1'**.
12. Figure S8. 3-D supramolecular network assembled by intermolecular hydrogen bonding C-H...Cl interaction along *b* axis in **5**.
13. Figure S9. 1-D chain-like structure assembled via intermolecular hydrogen bonding C-H...Cl and  $\pi$ ... $\pi$  packing interactions in **6**.
14. Figure S10. 3-D supramolecular network constructed by intermolecular hydrogen bonding C(O)-H...Cl interactions along *b* axis in **7**.
15. Figure S11. 2-D supramolecular layer with the thickness of 0.681 Å assembled by intermolecular hydrogen bonding C-H...Cl and  $\pi$ ... $\pi$  packing interactions along *b* axis in **8**.
16. Figure S12. Molecular structure of compound **2'**.
17. Figure S13. Solid-state emission spectra for compounds **1-9** and ligands L<sup>1-6</sup> (a, b, c, d, e, f) at room temperature.
18. Figure S14. UV-vis spectrum for compounds **1-9** and ligands L<sup>1-6</sup> (a, b, c, d, e, f) in acetonitrile at room temperature.
19. Figure S15. The TG curves of complexes **1-9** (a-i) at the range of 25-800 °C.
20. Figure S16. PXRD patterns of as-prepared and nine repeated samples of **1-9**(a-i) in comparison with the simulations from the single-crystal data.
21. Figure S17 IR spectra of complexes **1-9**(a-i).

Table S1 Crystal data and structure refinement of three compounds 1-3.

|                                                                           | <b>1</b>                                                                                        | <b>2</b>                                                                                       | <b>3</b>                                                                        |
|---------------------------------------------------------------------------|-------------------------------------------------------------------------------------------------|------------------------------------------------------------------------------------------------|---------------------------------------------------------------------------------|
| Chemical formula                                                          | C <sub>72</sub> H <sub>70</sub> Cd <sub>7</sub> Cl <sub>14</sub> N <sub>18</sub> O <sub>2</sub> | C <sub>50</sub> H <sub>42</sub> Cd <sub>2</sub> Cl <sub>2</sub> N <sub>12</sub> O <sub>4</sub> | C <sub>48</sub> H <sub>32</sub> Cd <sub>2</sub> Cl <sub>4</sub> N <sub>12</sub> |
| <i>M</i>                                                                  | 2502.56                                                                                         | 1170.66                                                                                        | 1143.46                                                                         |
| Crystal system                                                            | Monoclinic                                                                                      | Triclinic                                                                                      | Triclinic                                                                       |
| Space group                                                               | <i>P</i> 2(1)/ <i>c</i>                                                                         | <i>P</i> -1                                                                                    | <i>P</i> -1                                                                     |
| <i>a</i> / Å                                                              | 19.5538(15)                                                                                     | 9.5160(8)                                                                                      | 9.471(5)                                                                        |
| <i>b</i> / Å                                                              | 16.2417(12)                                                                                     | 10.9133(9)                                                                                     | 10.437(6)                                                                       |
| <i>c</i> / Å                                                              | 27.985(2)                                                                                       | 12.1129(10)                                                                                    | 13.576(8)                                                                       |
| $\alpha$ / °                                                              | 90                                                                                              | 94.787(2)                                                                                      | 72.174(7)                                                                       |
| $\beta$ / °                                                               | 94.8630(10)                                                                                     | 90.019(2)                                                                                      | 78.698(7)                                                                       |
| $\gamma$ / °                                                              | 90                                                                                              | 108.440(2)                                                                                     | 81.504(7)                                                                       |
| <i>V</i> / Å <sup>3</sup>                                                 | 8855.7(11)                                                                                      | 1188.71(17)                                                                                    | 1247.3(12)                                                                      |
| <i>Z</i>                                                                  | 4                                                                                               | 1                                                                                              | 1                                                                               |
| <i>T</i> / K                                                              | 298(2)                                                                                          | 298(2)                                                                                         | 298(2)                                                                          |
| <i>F</i> (000)                                                            | 4872                                                                                            | 588                                                                                            | 568                                                                             |
| <i>D</i> <sub>calcd</sub> / g cm <sup>-3</sup>                            | 1.877                                                                                           | 1.635                                                                                          | 1.522                                                                           |
| $\mu$ / mm <sup>-1</sup>                                                  | 2.125                                                                                           | 1.067                                                                                          | 1.113                                                                           |
| $\lambda$ / Å                                                             | 0.71073                                                                                         | 0.71073                                                                                        | 0.71073                                                                         |
| <i>R</i> <sub>int</sub>                                                   | 0.0706                                                                                          | 0.0295                                                                                         | 0.0471                                                                          |
| data/restraint/parm                                                       | 16034 / 7 / 982                                                                                 | 4272 / 0 / 318                                                                                 | 4422 / 0 / 299                                                                  |
| GOF                                                                       | 1.016                                                                                           | 1.080                                                                                          | 1.037                                                                           |
| <i>R</i> <sub>1</sub> [ <i>I</i> = 2 $\sigma$ ( <i>I</i> )] <sup>a</sup>  | 0.0554                                                                                          | 0.0552                                                                                         | 0.0590                                                                          |
| <i>wR</i> <sub>2</sub> [ <i>I</i> = 2 $\sigma$ ( <i>I</i> )] <sup>b</sup> | 0.1273                                                                                          | 0.0853                                                                                         | 0.0857                                                                          |
| <i>R</i> <sub>1</sub> [all data] <sup>a</sup>                             | 0.1302                                                                                          | 0.1253                                                                                         | 0.1372                                                                          |
| <i>wR</i> <sub>2</sub> [all data] <sup>b</sup>                            | 0.1642                                                                                          | 0.1445                                                                                         | 0.1724                                                                          |
| Largest diff. peak and hole (e <sup>-</sup> · Å <sup>-3</sup> )           | 0.915 and -1.160                                                                                | 0.508 and -0.503                                                                               | 1.208 and -1.000                                                                |

(to be continued) Table S1 Crystal data and structure refinement of three compounds 4-6.

|                                                                           | <b>4</b>                                                                         | <b>5</b>                                                                                       | <b>6</b>                                                         |
|---------------------------------------------------------------------------|----------------------------------------------------------------------------------|------------------------------------------------------------------------------------------------|------------------------------------------------------------------|
| Chemical formula                                                          | C <sub>24</sub> H <sub>18</sub> Cd <sub>2</sub> Cl <sub>4</sub> N <sub>6</sub> O | C <sub>74</sub> H <sub>58</sub> Cd <sub>4</sub> Cl <sub>4</sub> N <sub>20</sub> O <sub>3</sub> | C <sub>18</sub> H <sub>14</sub> CdCl <sub>2</sub> N <sub>4</sub> |
| <i>M</i>                                                                  | 773.04                                                                           | 1866.80                                                                                        | 469.63                                                           |
| Crystal system                                                            | Monoclinic                                                                       | Monoclinic                                                                                     | Monoclinic                                                       |
| Space group                                                               | <i>C2/c</i>                                                                      | <i>P2(1)/c</i>                                                                                 | <i>P2(1)/c</i>                                                   |
| <i>a</i> /Å                                                               | 20.685(3)                                                                        | 12.900(4)                                                                                      | 7.5806(12)                                                       |
| <i>b</i> /Å                                                               | 12.3021(16)                                                                      | 13.916(4)                                                                                      | 17.674(3)                                                        |
| <i>c</i> /Å                                                               | 13.7360(18)                                                                      | 21.676(7)                                                                                      | 13.270(2)                                                        |
| $\alpha$ /°                                                               | 90                                                                               | 90                                                                                             | 90                                                               |
| $\beta$ /°                                                                | 125.5010(10)                                                                     | 98.187(4)                                                                                      | 90.756(2)                                                        |
| $\gamma$ /°                                                               | 90                                                                               | 90                                                                                             | 90                                                               |
| <i>V</i> /Å <sup>3</sup>                                                  | 2845.6(6)                                                                        | 3852(2)                                                                                        | 1777.8(5)                                                        |
| <i>Z</i>                                                                  | 4                                                                                | 2                                                                                              | 4                                                                |
| <i>T</i> /K                                                               | 298(2)                                                                           | 298(2)                                                                                         | 298(2)                                                           |
| <i>F</i> (000)                                                            | 1504                                                                             | 1852                                                                                           | 928                                                              |
| <i>D</i> <sub>calcd</sub> / gcm <sup>-3</sup>                             | 1.804                                                                            | 1.610                                                                                          | 1.755                                                            |
| $\mu$ /mm <sup>-1</sup>                                                   | 1.899                                                                            | 1.288                                                                                          | 1.537                                                            |
| $\lambda$ /Å                                                              | 0.71073                                                                          | 0.71073                                                                                        | 0.71073                                                          |
| <i>R</i> <sub>int</sub>                                                   | 0.0245                                                                           | 0.0636                                                                                         | 0.0478                                                           |
| data/restraint/parm                                                       | 2584 / 1 / 171                                                                   | 6977 / 3 / 486                                                                                 | 3194 / 0 / 226                                                   |
| GOF                                                                       | 1.081                                                                            | 1.018                                                                                          | 1.014                                                            |
| <i>R</i> <sub>1</sub> [ <i>I</i> = 2 $\sigma$ ( <i>I</i> )] <sup>a</sup>  | 0.0365                                                                           | 0.0518                                                                                         | 0.0420                                                           |
| <i>wR</i> <sub>2</sub> [ <i>I</i> = 2 $\sigma$ ( <i>I</i> )] <sup>b</sup> | 0.0460                                                                           | 0.0927                                                                                         | 0.0769                                                           |
| <i>R</i> <sub>1</sub> [all data] <sup>a</sup>                             | 0.1007                                                                           | 0.1177                                                                                         | 0.0806                                                           |
| <i>wR</i> <sub>2</sub> [all data] <sup>b</sup>                            | 0.1082                                                                           | 0.1421                                                                                         | 0.0965                                                           |
| Largest diff. peak<br>and hole(e·Å <sup>-3</sup> )                        | 1.015 and -0.597                                                                 | 0.680 and -0.667                                                                               | 0.469 and -0.426                                                 |

(to be continued) Table S1 Crystal data and structure refinement of three compounds 7-9.

|                                                                  | <b>7</b>                                                                         | <b>8</b>                                                                       | <b>9</b>                                                                                      |
|------------------------------------------------------------------|----------------------------------------------------------------------------------|--------------------------------------------------------------------------------|-----------------------------------------------------------------------------------------------|
| Chemical formula                                                 | C <sub>37</sub> H <sub>31</sub> Cd <sub>2</sub> Cl <sub>4</sub> N <sub>8</sub> O | C <sub>36</sub> H <sub>26</sub> Cd <sub>2</sub> Cl <sub>4</sub> N <sub>8</sub> | C <sub>18</sub> H <sub>12</sub> Cd <sub>2</sub> Cl <sub>3</sub> N <sub>4</sub> O <sub>2</sub> |
| <i>M</i>                                                         | 970.30                                                                           | 937.25                                                                         | 647.47                                                                                        |
| Crystal system                                                   | Monoclinic                                                                       | Triclinic                                                                      | Monoclinic                                                                                    |
| Space group                                                      | <i>C2/c</i>                                                                      | <i>P</i> -1                                                                    | <i>P2(1)/c</i>                                                                                |
| <i>a</i> /Å                                                      | 24.137(4)                                                                        | 9.617(15)                                                                      | 11.7730(13)                                                                                   |
| <i>b</i> /Å                                                      | 15.255(4)                                                                        | 9.698(16)                                                                      | 19.686(2)                                                                                     |
| <i>c</i> /Å                                                      | 23.410(6)                                                                        | 10.175(16)                                                                     | 9.4109(10)                                                                                    |
| $\alpha$ /°                                                      | 90                                                                               | 89.54(3)                                                                       | 90                                                                                            |
| $\beta$ /°                                                       | 114.065(5)                                                                       | 79.24(2)                                                                       | 107.0280(10)                                                                                  |
| $\gamma$ /°                                                      | 90                                                                               | 86.21(3)                                                                       | 90                                                                                            |
| <i>V</i> /Å <sup>3</sup>                                         | 7870(3)                                                                          | 930(3)                                                                         | 2085.5(4)                                                                                     |
| <i>Z</i>                                                         | 8                                                                                | 1                                                                              | 4                                                                                             |
| <i>T</i> /K                                                      | 298(2)                                                                           | 298(2)                                                                         | 298(2)                                                                                        |
| <i>F</i> (000)                                                   | 3848                                                                             | 462                                                                            | 1244                                                                                          |
| <i>D</i> <sub>calcd</sub> / gcm <sup>-3</sup>                    | 1.638                                                                            | 1.673                                                                          | 2.062                                                                                         |
| $\mu$ /mm <sup>-1</sup>                                          | 1.393                                                                            | 1.468                                                                          | 2.446                                                                                         |
| $\lambda$ /Å                                                     | 0.71073                                                                          | 0.71073                                                                        | 0.71073                                                                                       |
| <i>R</i> <sub>int</sub>                                          | 0.0886                                                                           | 0.0522                                                                         | 0.0570                                                                                        |
| data/restraint/parm                                              | 7107/ 0 / 471                                                                    | 3295 / 0 / 227                                                                 | 3632 / 0 / 262                                                                                |
| GOF                                                              | 0.974                                                                            | 1.017                                                                          | 1.003                                                                                         |
| <i>R</i> <sub>1</sub> [ <i>I</i> = 2σ( <i>I</i> )] <sup>a</sup>  | 0.0544                                                                           | 0.0592                                                                         | 0.0475                                                                                        |
| <i>wR</i> <sub>2</sub> [ <i>I</i> = 2σ( <i>I</i> )] <sup>b</sup> | 0.1484                                                                           | 0.0832                                                                         | 0.0955                                                                                        |
| <i>R</i> <sub>1</sub> [all data] <sup>a</sup>                    | 0.0996                                                                           | 0.1445                                                                         | 0.1013                                                                                        |
| <i>wR</i> <sub>2</sub> [all data] <sup>b</sup>                   | 0.1290                                                                           | 0.1590                                                                         | 0.1217                                                                                        |
| Largest diff. peak<br>and hole(e·Å <sup>-3</sup> )               | 0.680 and -0.490                                                                 | 1.104 and -1.186                                                               | 0.782 and -0.561                                                                              |

<sup>a</sup>  $R_1 = \sum ||F_o| - |F_c|| / \sum |F_o|$ , <sup>b</sup>  $wR_2 = [\sum w(F_o^2 - F_c^2)^2 / \sum w(F_o^2)^2]^{1/2}$ , where  $w = 1 / [\sigma^2(F_o^2) + (aP)_2 + bP]$ .  $P = (F_o^2 + 2F_c^2) / 3$ .

(to be continued) Table S1 Crystal data and structure refinement of two compounds **1'** and **2'**

|                                                                  | <b>1'</b>                                                                                     | <b>2'</b>                                            |
|------------------------------------------------------------------|-----------------------------------------------------------------------------------------------|------------------------------------------------------|
| Chemical formula                                                 | C <sub>26</sub> H <sub>30</sub> Cd <sub>2</sub> Cl <sub>4</sub> N <sub>6</sub> O <sub>2</sub> | C <sub>14</sub> H <sub>11</sub> CdClN <sub>4</sub> S |
| <i>M</i>                                                         | 825.16                                                                                        | 415.18                                               |
| Crystal system                                                   | Triclinic                                                                                     | Triclinic                                            |
| Space group                                                      | <i>P</i> -1                                                                                   | <i>P</i> -1                                          |
| <i>a</i> / Å                                                     | 7.3515(10)                                                                                    | 8.41(2)                                              |
| <i>b</i> / Å                                                     | 9.4349(12)                                                                                    | 9.44(2)                                              |
| <i>c</i> / Å                                                     | 12.6530(16)                                                                                   | 10.76(3)                                             |
| $\alpha$ /°                                                      | 100.021(2)                                                                                    | 68.21(3)                                             |
| $\beta$ /°                                                       | 102.220(2)                                                                                    | 67.16(3)                                             |
| $\gamma$ /°                                                      | 112.091(2)                                                                                    | 86.97(3)                                             |
| <i>V</i> /Å <sup>3</sup>                                         | 762.96(17)                                                                                    | 727(3)                                               |
| <i>Z</i>                                                         | 1                                                                                             | 2                                                    |
| <i>T</i> /K                                                      | 298(2)                                                                                        | 298(2)                                               |
| <i>F</i> (000)                                                   | 408                                                                                           | 408                                                  |
| <i>D</i> <sub>calcd</sub> / gcm <sup>-3</sup>                    | 1.796                                                                                         | 1.897                                                |
| $\mu$ /mm <sup>-1</sup>                                          | 1.779                                                                                         | 1.826                                                |
| $\lambda$ / Å                                                    | 0.71073                                                                                       | 0.71073                                              |
| <i>R</i> <sub>int</sub>                                          | 0.0186                                                                                        | 0.0393                                               |
| data/restraint/parm                                              | 2499 / 3 / 188                                                                                | 2478 / 0 / 192                                       |
| GOF                                                              | 1.070                                                                                         | 1.089                                                |
| <i>R</i> <sub>1</sub> [ <i>I</i> = 2σ( <i>I</i> )] <sup>a</sup>  | 0.0381                                                                                        | 0.0656                                               |
| <i>wR</i> <sub>2</sub> [ <i>I</i> = 2σ( <i>I</i> )] <sup>b</sup> | 0.0467                                                                                        | 0.1104                                               |
| <i>R</i> <sub>1</sub> [all data] <sup>a</sup>                    | 0.0983                                                                                        | 0.1774                                               |
| <i>wR</i> <sub>2</sub> [all data] <sup>b</sup>                   | 0.1058                                                                                        | 0.1253                                               |
| Largest diff. peak<br>and hole(e·Å <sup>-3</sup> )               | 0.799 and -0.838                                                                              | 1.262 and -1.091                                     |

<sup>a</sup>  $R_1 = \sum ||F_o| - |F_c|| / \sum |F_o|$ , <sup>b</sup>  $wR_2 = [\sum w(F_o^2 - F_c^2)^2 / \sum w(F_o^2)^2]^{1/2}$ , where  $w = 1 / [\sigma^2(F_o^2) + (aP)_2 + bP]$ .  $P = (F_o^2 + 2F_c^2) / 3$ .

Table S2. Selected atomic distances (Å) and bond angles (°) for compounds **1-9**.

| <b>1</b>     |            |                    |            |
|--------------|------------|--------------------|------------|
| N(17)-Cd(7)  | 2.334(3)   | Cl(1)-Cd(2)-Cl(5)  | 88.84(10)  |
| N(7)-Cd(3)   | 2.442(3)   | Cl(6)-Cd(2)-Cl(5)  | 171.43(10) |
| N(18)-Cd(7)  | 2.310(4)   | Cl(7)-Cd(2)-Cl(5)  | 84.14(4)   |
| Cd(1)-N(6)#1 | 2.299(4)   | Cl(2)-Cd(2)-Cl(5)  | 118.72(8)  |
| Cd(1)-N(3)#1 | 2.304(4)   | Cl(1)-Cd(2)-Cl(3)  | 95.10(4)   |
| Cd(1)-N(1)#1 | 2.411(4)   | Cl(6)-Cd(2)-Cl(3)  | 171.34(4)  |
| Cd(1)-Cl(2)  | 2.5150(12) | Cl(7)-Cd(2)-Cl(3)  | 89.53(4)   |
| Cd(1)-N(2)#1 | 2.547(3)   | Cl(2)-Cd(2)-Cl(3)  | 83.18(4)   |
| Cd(1)-Cl(1)  | 2.7049(12) | Cl(5)-Cd(2)-Cl(3)  | 93.67(4)   |
| Cd(2)-Cl(1)  | 2.6202(12) | N(9)-Cd(3)-N(12)   | 89.23(4)   |
| Cd(2)-Cl(6)  | 2.6298(12) | N(9)-Cd(3)-N(7)    | 96.57(4)   |
| Cd(2)-Cl(7)  | 2.6380(12) | N(12)-Cd(3)-N(7)   | 83.40(4)   |
| Cd(2)-Cl(2)  | 2.6527(13) | N(9)-Cd(3)-Cl(4)   | 91.22(4)   |
| Cd(2)-Cl(5)  | 2.6582(12) | N(12)-Cd(3)-Cl(4)  | 177.04(4)  |
| Cd(2)-Cl(3)  | 2.6994(13) | N(7)-Cd(3)-Cl(4)   | 89.60(4)   |
| Cd(3)-N(9)   | 2.293(4)   | N(9)-Cd(3)-N(8)    | 174.51(4)  |
| Cd(3)-N(12)  | 2.356(4)   | N(12)-Cd(3)-N(8)   | 86.17(4)   |
| Cd(3)-Cl(4)  | 2.4530(18) | N(7)-Cd(3)-N(8)    | 89.68(4)   |
| Cd(3)-N(8)   | 2.493(4)   | Cl(4)-Cd(3)-N(8)   | 93.27(4)   |
| Cd(3)-Cl(3)  | 2.6982(14) | N(9)-Cd(3)-Cl(3)   | 138.56(14) |
| Cd(4)-N(10)  | 2.311(4)   | N(12)-Cd(3)-Cl(3)  | 94.91(13)  |
| Cd(4)-Cl(8)  | 2.4441(14) | N(7)-Cd(3)-Cl(3)   | 78.89(12)  |
| Cd(4)-Cl(9)  | 2.5612(13) | Cl(4)-Cd(3)-Cl(3)  | 107.33(11) |
| Cd(4)-Cl(7)  | 2.5738(13) | N(8)-Cd(3)-Cl(3)   | 113.76(11) |
| Cd(5)-N(4)   | 2.395(4)   | N(10)-Cd(4)-Cl(8)  | 105.78(10) |
| Cd(5)-Cl(6)  | 2.5949(13) | N(10)-Cd(4)-Cl(9)  | 96.57(10)  |
| Cd(5)-Cl(9)  | 2.5974(12) | Cl(8)-Cd(4)-Cl(9)  | 100.77(5)  |
| Cd(5)-Cl(10) | 2.6499(14) | N(10)-Cd(4)-Cl(7)  | 138.26(10) |
| Cd(5)-Cl(5)  | 2.6700(11) | Cl(8)-Cd(4)-Cl(7)  | 112.82(5)  |
| Cd(6)-Cl(11) | 2.4409(16) | Cl(9)-Cd(4)-Cl(7)  | 91.42(4)   |
| Cd(6)-Cl(12) | 2.4431(14) | N(4)-Cd(5)-Cl(6)   | 163.44(9)  |
| Cd(6)-Cl(13) | 2.4505(17) | N(4)-Cd(5)-Cl(9)   | 90.41(9)   |
| Cd(6)-Cl(10) | 2.5288(15) | Cl(6)-Cd(5)-Cl(9)  | 106.13(4)  |
| Cd(7)-N(15)  | 2.341(5)   | N(4)-Cd(5)-Cl(10)  | 89.80(9)   |
| Cd(7)-N(13)  | 2.425(5)   | Cl(6)-Cd(5)-Cl(10) | 90.94(4)   |
| Cd(7)-Cl(14) | 2.4340(16) | Cl(9)-Cd(5)-Cl(10) | 84.66(4)   |
| Cd(7)-N(14)  | 2.629(7)   | N(4)-Cd(5)-Cl(5)   | 96.67(9)   |
| N(1)-Cd(1)#2 | 2.411(4)   | Cl(6)-Cd(5)-Cl(5)  | 83.84(4)   |

|                     |            |                     |            |
|---------------------|------------|---------------------|------------|
| N(2)-Cd(1)#2        | 2.547(3)   | Cl(9)-Cd(5)-Cl(5)   | 91.83(4)   |
| N(3)-Cd(1)#2        | 2.304(4)   | Cl(10)-Cd(5)-Cl(5)  | 172.67(4)  |
| N(6)-Cd(1)#2        | 2.299(4)   | Cl(11)-Cd(6)-Cl(12) | 111.73(5)  |
| N(6)#1-Cd(1)-N(3)#1 | 92.07(10)  | Cl(11)-Cd(6)-Cl(13) | 115.66(6)  |
| N(6)#1-Cd(1)-N(1)#1 | 69.47(13)  | Cl(12)-Cd(6)-Cl(13) | 114.73(6)  |
| N(3)#1-Cd(1)-N(1)#1 | 69.78(13)  | Cl(11)-Cd(6)-Cl(10) | 113.54(5)  |
| N(6)#1-Cd(1)-Cl(2)  | 71.27(12)  | Cl(12)-Cd(6)-Cl(10) | 100.13(5)  |
| N(3)#1-Cd(1)-Cl(2)  | 162.32(10) | Cl(13)-Cd(6)-Cl(10) | 99.35(6)   |
| N(1)#1-Cd(1)-Cl(2)  | 87.45(10)  | N(17)-Cd(7)-N(18)   | 83.30(11)  |
| N(6)#1-Cd(1)-N(2)#1 | 95.02(10)  | N(17)-Cd(7)-N(15)   | 104.51(14) |
| N(3)#1-Cd(1)-N(2)#1 | 173.06(8)  | N(18)-Cd(7)-N(15)   | 146.78(15) |
| N(1)#1-Cd(1)-N(2)#1 | 93.46(6)   | N(17)-Cd(7)-N(13)   | 149.82(13) |
| Cl(2)-Cd(1)-N(2)#1  | 103.62(10) | N(18)-Cd(7)-N(13)   | 80.78(14)  |
| N(6)#1-Cd(1)-Cl(1)  | 137.39(13) | N(15)-Cd(7)-N(13)   | 76.82(16)  |
| N(3)#1-Cd(1)-Cl(1)  | 88.85(13)  | N(17)-Cd(7)-Cl(14)  | 98.88(9)   |
| N(1)#1-Cd(1)-Cl(1)  | 97.08(14)  | N(18)-Cd(7)-Cl(14)  | 109.22(11) |
| Cl(2)-Cd(1)-Cl(1)   | 121.22(10) | N(15)-Cd(7)-Cl(14)  | 101.50(12) |
| N(2)#1-Cd(1)-Cl(1)  | 101.14(10) | N(13)-Cd(7)-Cl(14)  | 110.51(11) |
| Cl(1)-Cd(2)-Cl(6)   | 88.64(9)   | N(17)-Cd(7)-N(14)   | 89.1(2)    |
| Cl(1)-Cd(2)-Cl(7)   | 71.79(12)  | N(18)-Cd(7)-N(14)   | 73.45(14)  |
| Cl(6)-Cd(2)-Cl(7)   | 71.15(12)  | N(15)-Cd(7)-N(14)   | 74.43(14)  |
| Cl(1)-Cd(2)-Cl(2)   | 69.28(12)  | N(13)-Cd(7)-N(14)   | 61.8(2)    |
| Cl(6)-Cd(2)-Cl(2)   | 154.88(8)  | Cl(14)-Cd(7)-N(14)  | 171.77(18) |
| Cl(7)-Cd(2)-Cl(2)   | 90.97(9)   |                     |            |
| <b>2</b>            |            |                     |            |
| Cd(1)-N(2)          | 2.160(5)   | N(2)-Cd(1)-Cl(1)    | 127.53(13) |
| Cd(1)-N(4)#1        | 2.255(5)   | N(4)#1-Cd(1)-Cl(1)  | 98.56(14)  |
| Cd(1)-N(3)          | 2.428(5)   | N(3)-Cd(1)-Cl(1)    | 102.71(13) |
| Cd(1)-Cl(1)         | 2.4504(18) | N(2)-Cd(1)-N(1)     | 66.81(17)  |
| Cd(1)-N(1)          | 2.572(5)   | N(4)#1-Cd(1)-N(1)   | 92.00(18)  |
| N(2)-Cd(1)-N(4)#1   | 131.11(18) | N(3)-Cd(1)-N(1)     | 137.05(18) |
| N(2)-Cd(1)-N(3)     | 70.35(18)  | Cl(1)-Cd(1)-N(1)    | 100.68(13) |
| N(4)#1-Cd(1)-N(3)   | 119.14(18) |                     |            |
| <b>3</b>            |            |                     |            |
| Cd(1)-N(2)          | 2.345(8)   | N(3)-Cd(1)-Cl(2)    | 109.4(2)   |
| Cd(1)-N(1)          | 2.365(7)   | N(2)-Cd(1)-Cl(1)    | 93.7(2)    |
| Cd(1)-N(3)          | 2.370(7)   | N(1)-Cd(1)-Cl(1)    | 90.0(2)    |
| Cd(1)-Cl(2)         | 2.470(3)   | N(3)-Cd(1)-Cl(1)    | 98.1(2)    |
| Cd(1)-Cl(1)         | 2.525(3)   | Cl(2)-Cd(1)-Cl(1)   | 101.44(9)  |
| Cd(1)-Cl(2)#1       | 2.863(3)   | N(2)-Cd(1)-Cl(2)#1  | 81.24(19)  |



|                  |            |                     |            |
|------------------|------------|---------------------|------------|
| Cl(2)-Cd(1)#1    | 2.863(3)   | N(1)-Cd(1)-Cl(2)#1  | 88.1(2)    |
| N(2)-Cd(1)-N(1)  | 68.8(2)    | N(3)-Cd(1)-Cl(2)#1  | 80.2(2)    |
| N(2)-Cd(1)-N(3)  | 68.5(3)    | Cl(2)-Cd(1)-Cl(2)#1 | 83.60(9)   |
| N(1)-Cd(1)-N(3)  | 136.9(3)   | Cl(1)-Cd(1)-Cl(2)#1 | 174.96(8)  |
| N(2)-Cd(1)-Cl(2) | 164.8(2)   | Cd(1)-Cl(2)-Cd(1)#1 | 96.40(9)   |
| N(1)-Cd(1)-Cl(2) | 110.22(19) |                     |            |
| <b>4</b>         |            |                     |            |
| Cd(1)-N(3)       | 2.3424(18) | N(3)-Cd(1)-Cl(2)    | 113.69(5)  |
| Cd(1)-N(1)       | 2.3679(19) | N(1)-Cd(1)-Cl(2)    | 106.79(5)  |
| Cd(1)-N(2)       | 2.4268(13) | N(2)-Cd(1)-Cl(2)    | 146.23(6)  |
| Cd(1)-Cl(2)      | 2.4298(8)  | N(3)-Cd(1)-Cl(1)    | 96.12(6)   |
| Cd(1)-Cl(1)      | 2.4996(10) | N(1)-Cd(1)-Cl(1)    | 91.64(6)   |
| N(3)-Cd(1)-N(1)  | 135.57(5)  | N(2)-Cd(1)-Cl(1)    | 110.03(5)  |
| N(3)-Cd(1)-N(2)  | 68.48(6)   | Cl(2)-Cd(1)-Cl(1)   | 103.32(3)  |
| N(1)-Cd(1)-N(2)  | 67.77(6)   |                     |            |
| <b>5</b>         |            |                     |            |
| Cd(1)-N(7)       | 2.224(5)   | N(1)-Cd(1)-N(9)     | 157.61(19) |
| Cd(1)-N(2)       | 2.328(5)   | N(7)-Cd(1)-Cl(1)    | 122.56(15) |
| Cd(1)-N(1)       | 2.359(5)   | N(2)-Cd(1)-Cl(1)    | 106.57(15) |
| Cd(1)-N(9)       | 2.418(5)   | N(1)-Cd(1)-Cl(1)    | 98.53(14)  |
| Cd(1)-Cl(1)      | 2.442(2)   | N(9)-Cd(1)-Cl(1)    | 103.66(15) |
| Cd(2)-N(4)       | 2.208(5)   | N(4)-Cd(2)-N(10)    | 131.28(19) |
| Cd(2)-N(10)      | 2.299(5)   | N(4)-Cd(2)-N(6)     | 98.34(19)  |
| Cd(2)-N(6)       | 2.363(5)   | N(10)-Cd(2)-N(6)    | 82.94(19)  |
| Cd(2)-N(5)       | 2.425(6)   | N(4)-Cd(2)-N(5)     | 72.2(2)    |
| Cd(2)-Cl(2)      | 2.440(2)   | N(10)-Cd(2)-N(5)    | 86.5(2)    |
| N(7)-Cd(1)-N(2)  | 130.05(19) | N(6)-Cd(2)-N(5)     | 155.2(2)   |
| N(7)-Cd(1)-N(1)  | 98.15(18)  | N(4)-Cd(2)-Cl(2)    | 122.63(15) |
| N(2)-Cd(1)-N(1)  | 81.88(18)  | N(10)-Cd(2)-Cl(2)   | 105.10(14) |
| N(7)-Cd(1)-N(9)  | 72.40(18)  | N(6)-Cd(2)-Cl(2)    | 98.11(14)  |
| N(2)-Cd(1)-N(9)  | 88.87(18)  | N(5)-Cd(2)-Cl(2)    | 106.30(16) |
| <b>6</b>         |            |                     |            |
| Cd(1)-N(2)       | 2.240(5)   | N(2)-Cd(1)-Cl(2)    | 98.16(13)  |
| Cd(1)-N(1)       | 2.393(5)   | N(1)-Cd(1)-Cl(2)    | 100.50(12) |
| Cd(1)-Cl(1)      | 2.4158(17) | Cl(1)-Cd(1)-Cl(2)   | 112.06(6)  |
| Cd(1)-Cl(2)      | 2.4676(17) | N(2)-Cd(1)-N(4)     | 67.5(2)    |
| Cd(1)-N(4)       | 2.477(5)   | N(1)-Cd(1)-N(4)     | 134.20(17) |
| N(2)-Cd(1)-N(1)  | 79.6(2)    | Cl(1)-Cd(1)-N(4)    | 92.43(15)  |

|                  |            |                   |            |
|------------------|------------|-------------------|------------|
| N(2)-Cd(1)-Cl(1) | 148.92(13) | Cl(2)-Cd(1)-N(4)  | 114.57(12) |
| N(1)-Cd(1)-Cl(1) | 101.03(15) |                   |            |
| <b>7</b>         |            |                   |            |
| Cd(1)-N(2)       | 2.251(4)   | Cl(1)-Cd(1)-Cl(2) | 116.90(7)  |
| Cd(1)-N(3)       | 2.417(4)   | N(2)-Cd(1)-N(1)   | 67.76(17)  |
| Cd(1)-Cl(1)      | 2.430(2)   | N(3)-Cd(1)-N(1)   | 143.95(17) |
| Cd(1)-Cl(2)      | 2.437(2)   | Cl(1)-Cd(1)-N(1)  | 102.09(13) |
| Cd(1)-N(1)       | 2.452(6)   | Cl(2)-Cd(1)-N(1)  | 93.81(15)  |
| Cd(2)-N(6)       | 2.270(4)   | N(6)-Cd(2)-N(5)   | 77.64(16)  |
| Cd(2)-N(5)       | 2.427(5)   | N(6)-Cd(2)-Cl(4)  | 137.26(14) |
| Cd(2)-Cl(4)      | 2.431(2)   | N(5)-Cd(2)-Cl(4)  | 99.33(14)  |
| Cd(2)-N(7)       | 2.434(5)   | N(6)-Cd(2)-N(7)   | 69.45(17)  |
| Cd(2)-Cl(3)      | 2.461(2)   | N(5)-Cd(2)-N(7)   | 142.32(15) |
| N(2)-Cd(1)-N(3)  | 81.32(16)  | Cl(4)-Cd(2)-N(7)  | 92.86(15)  |
| N(2)-Cd(1)-Cl(1) | 102.66(12) | N(6)-Cd(2)-Cl(3)  | 108.20(14) |
| N(3)-Cd(1)-Cl(1) | 102.40(13) | N(5)-Cd(2)-Cl(3)  | 99.97(13)  |
| N(2)-Cd(1)-Cl(2) | 139.32(13) | Cl(4)-Cd(2)-Cl(3) | 114.23(6)  |
| N(3)-Cd(1)-Cl(2) | 98.22(13)  | N(7)-Cd(2)-Cl(3)  | 107.21(15) |
| <b>8</b>         |            |                   |            |
| Cd(1)-N(2)       | 2.319(5)   | N(2)-Cd(1)-Cl(2)  | 142.06(18) |
| Cd(1)-N(1)       | 2.450(7)   | N(1)-Cd(1)-Cl(2)  | 91.30(15)  |
| Cd(1)-Cl(1)      | 2.480(4)   | Cl(1)-Cd(1)-Cl(2) | 112.33(8)  |
| Cd(1)-Cl(2)      | 2.481(4)   | N(2)-Cd(1)-N(3)   | 77.58(17)  |
| Cd(1)-N(3)       | 2.529(6)   | N(1)-Cd(1)-N(3)   | 135.22(19) |
| N(2)-Cd(1)-N(1)  | 69.81(18)  | Cl(1)-Cd(1)-N(3)  | 107.52(18) |
| N(2)-Cd(1)-Cl(1) | 105.10(17) | Cl(2)-Cd(1)-N(3)  | 96.38(12)  |
| N(1)-Cd(1)-Cl(1) | 110.0(2)   |                   |            |
| <b>9</b>         |            |                   |            |
| Cd(1)-N(2)       | 2.319(5)   | N(2)-Cd(1)-Cl(2)  | 142.06(18) |
| Cd(1)-N(1)       | 2.450(7)   | N(1)-Cd(1)-Cl(2)  | 91.30(15)  |
| Cd(1)-Cl(1)      | 2.480(4)   | Cl(1)-Cd(1)-Cl(2) | 112.33(8)  |
| Cd(1)-Cl(2)      | 2.481(4)   | N(2)-Cd(1)-N(3)   | 77.58(17)  |
| Cd(1)-N(3)       | 2.529(6)   | N(1)-Cd(1)-N(3)   | 135.22(19) |
| N(2)-Cd(1)-N(1)  | 69.81(18)  | Cl(1)-Cd(1)-N(3)  | 107.52(18) |
| N(2)-Cd(1)-Cl(1) | 105.10(17) | Cl(2)-Cd(1)-N(3)  | 96.38(12)  |
| N(1)-Cd(1)-Cl(1) | 110.0(2)   |                   |            |

Table S3 Distances (Å) and angles (°) of hydrogen bonds for compounds **1-8**.

| D-H...A                | Distance(D-H) | Distance(H...A) | Distance(D...A) | Angle(D-H...A) |
|------------------------|---------------|-----------------|-----------------|----------------|
| <b>1</b>               |               |                 |                 |                |
| N(11)-H(11)...Cl(7)    | 0.86          | 2.491(3)        | 3.339(4)        | 171.1(4)       |
| N(5)-H(5)...Cl(10)     | 0.86          | 2.870(2)        | 3.705(3)        | 164.7(3)       |
| N(16)-H(16A...Cl(11)#1 | 0.86          | 2.823(2)        | 3.329(9)        | 119.3(2)       |
| <b>2</b>               |               |                 |                 |                |
| C(1)-H(1)...Cl(1)#2    | 0.93          | 2.455(3)        | 3.741(3)        | 157.1(5)       |
| C(13)-H(13)...Cl(1)#2  | 0.93          | 2.927(3)        | 3.624(3)        | 132.9(4)       |
| C(11)-H(11)...O(1)#3   | 0.93          | 2.563(3)        | 3.749(3)        | 158.5(5)       |
| C(22)-H(22)#4...Cl(1)  | 0.93          | 2.948(3)        | 3.675(3)        | 136.2(7)       |
| <b>3</b>               |               |                 |                 |                |
| C(22)-H(22)...Cl(1)#5  | 0.93          | 2.928(2)        | 3.723(3)        | 144.2(8)       |
| <b>4</b>               |               |                 |                 |                |
| C(4)-H(4)...Cl(1)#6    | 0.93          | 2.861(3)        | 3.548(3)        | 131.7(1)       |
| C(2)-H(2)...Cl(2)#7    | 0.93          | 2.713(3)        | 3.635(3)        | 171.6(1)       |
| <b>5</b>               |               |                 |                 |                |
| C(31)-H(31)...Cl(1)#8  | 0.93          | 2.939(3)        | 3.486(3)        | 119.1(2)       |
| C(10)-H(10)...Cl(2)#9  | 0.93          | 2.862(3)        | 3.777(3)        | 167.8(2)       |
| C(36)-H(36)...Cl(2)#10 | 0.93          | 2.940(3)        | 3.528(3)        | 122.5(2)       |
| <b>6</b>               |               |                 |                 |                |
| C(12)-H(12)...Cl(1)#11 | 0.93          | 2.737(2)        | 3.580(3)        | 151.1(3)       |
| C(15)-H(15)...Cl(1)#11 | 0.93          | 2.904(2)        | 3.774(3)        | 156.3(3)       |
| $\pi^a \cdots \pi^a$   |               | 3.770(3)        |                 |                |
| $\pi^a \cdots \pi^a$   |               | 3.608(3)        |                 |                |
| $\pi^a \cdots \pi^b$   |               | 3.964(3)        |                 |                |
| $\pi^a \cdots \pi^b$   |               | 3.802(3)        |                 |                |
| $\pi^a \cdots \pi^b$   |               | 3.821(3)        |                 |                |
| <b>7</b>               |               |                 |                 |                |
| C(17)-H(17)...Cl(2)#12 | 0.93          | 2.934(3)        | 3.622(3)        | 131.9(3)       |
| C(1)-H(1)...Cl(2)#14   | 0.93          | 2.921(3)        | 3.496(3)        | 121.3(3)       |
| C(1)-H(1)...Cl(1)      | 0.93          | 2.931(3)        | 3.563(3)        | 126.4(2)       |
| C(12)-H(12)...Cl(3)#13 | 0.93          | 2.877(3)        | 3.494(3)        | 125.0(3)       |
| C(19)-H(19)...Cl(3)    | 0.93          | 2.877(3)        | 3.565(3)        | 131.7(3)       |
| C(2)-H(2)...Cl(4)#15   | 0.93          | 2.922(3)        | 3.551(3)        | 126.3(3)       |
| C(6)-H(6)...Cl(4)      | 0.93          | 2.707(3)        | 3.680(3)        | 172.7(2)       |
| C(9)-H(9)...Cl(4)      | 0.93          | 2.872(3)        | 3.770(3)        | 162.7(2)       |

---

**8**

|                        |      |          |          |          |
|------------------------|------|----------|----------|----------|
| C(10)-H(10)···Cl(1)#16 | 0.93 | 2.865(3) | 3.777(3) | 167.3(5) |
| C(13)-H(13)···Cl(1)#16 | 0.93 | 2.886(3) | 3.859(3) | 171.6(3) |
| C(16)-H(16)···Cl(1)#17 | 0.93 | 2.871(3) | 3.649(3) | 141.9(5) |
| C(18)-H(18)···Cl(2)    | 0.93 | 2.849(3) | 3.552(3) | 133.3(4) |

---

\*Symmetry transformations used to generate equivalent atoms: **#1**  $-x+1, y+1/2, -z+1/2$ ; **#2**  $1-x, 2-y, 2-z$ ; **#3**  $1+x, 1+y, z$ ; **#4**  $-x, 2-y, 1-z$ ; **#5**  $x, -1+y, z$ ; **#6**  $0.5-x, -0.5+1, 0.5-z$ ; **#7**  $-x, -y, -z$ ; **#8**  $1-x, 1-y, -z$ ; **#9**  $2-x, 0.5+y, 0.5-z$ ; **#10**  $1-x, 0.5+y, 0.5-z$ ; **#11**  $2-x, -y, 1-z$ ; **#12**  $-x, y, 0.5-z$ ; **#13**  $x, 1-y, -0.5+z$ ; **#14**  $-x, 2-y, 1-z$ ; **#15**  $0.5-x, 0.5+y, 1.5-z$ ; **#16**  $-x, 2-y, 2-z$ ; **#17**  $x, y, 1+z$ ; **#18**.

\*Sign  $\pi^a$  represents the centroid of the pyridine ring, and  $\pi^b$  represents the centroid of the imidazole ring.

Figure S1

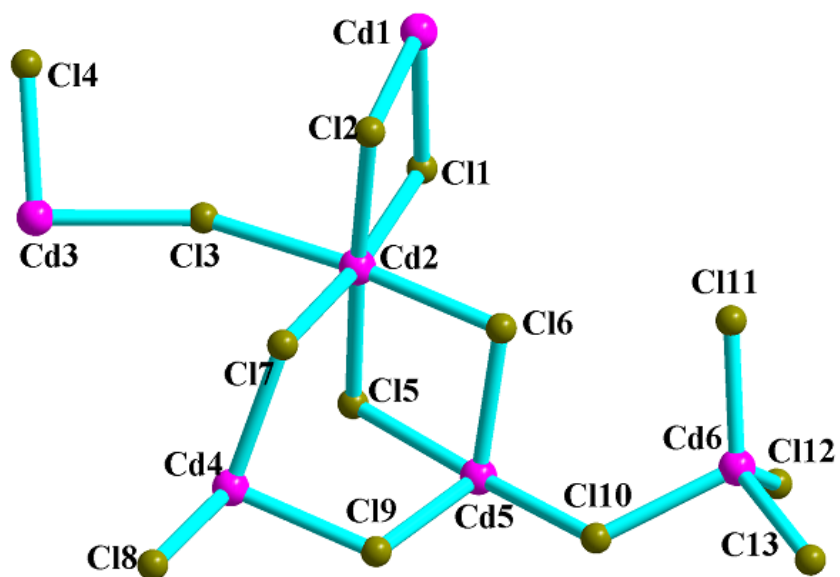

Figure S2

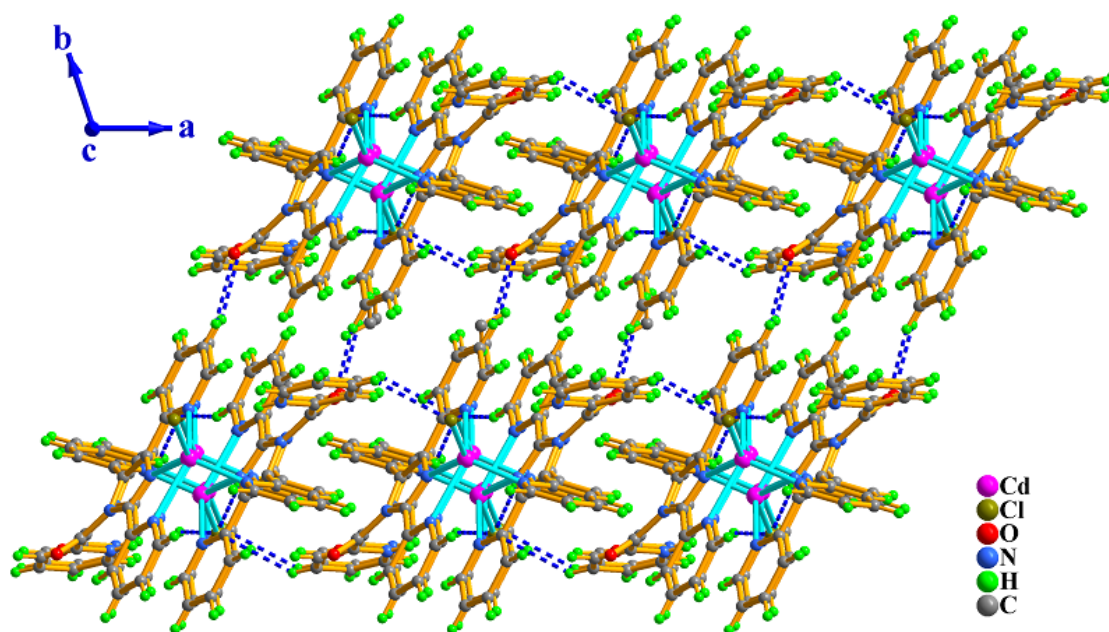

Figure S3

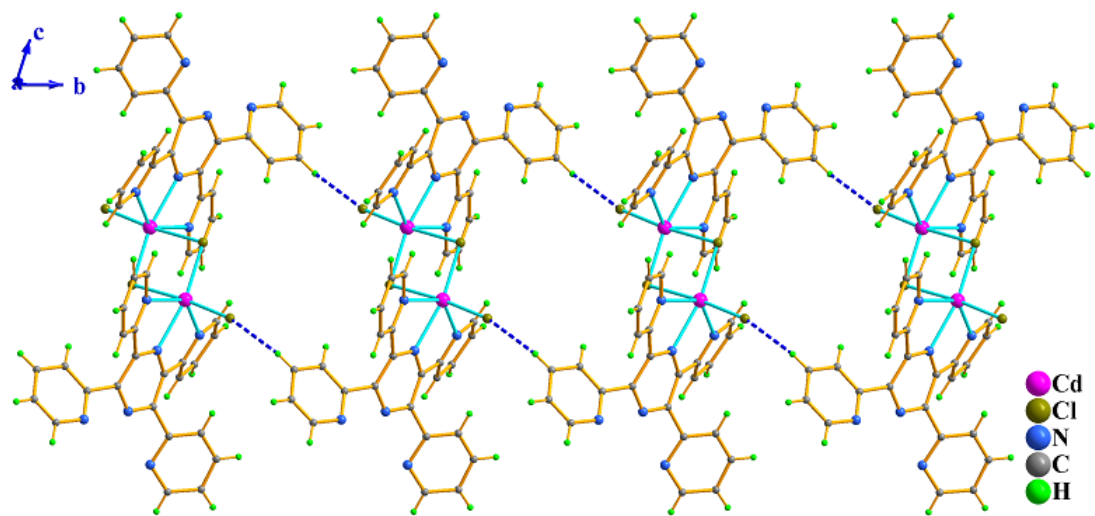

Figure S4

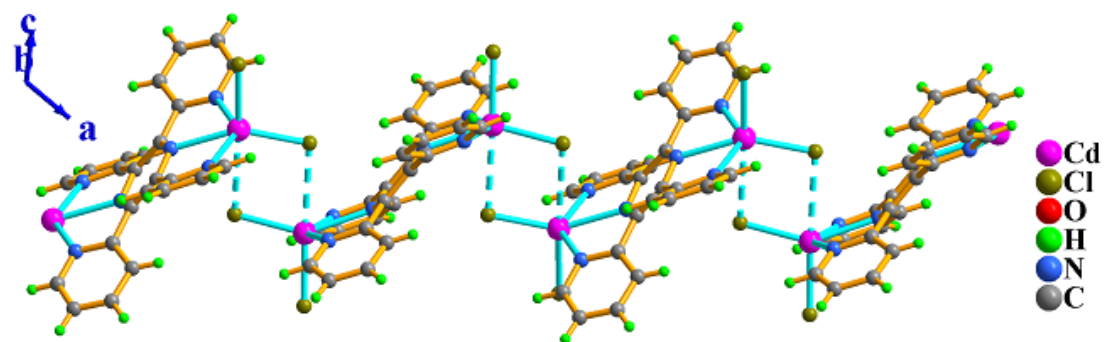

Figure S5

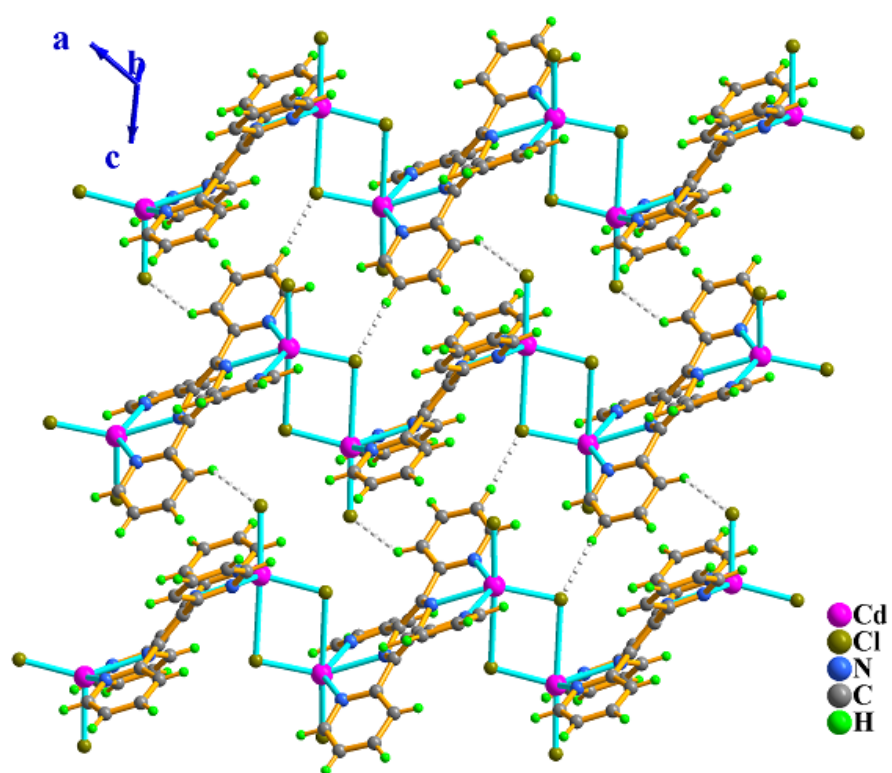

Scheme S1

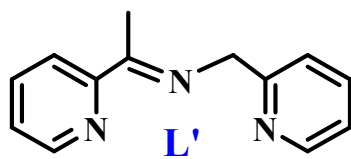

Figure S6

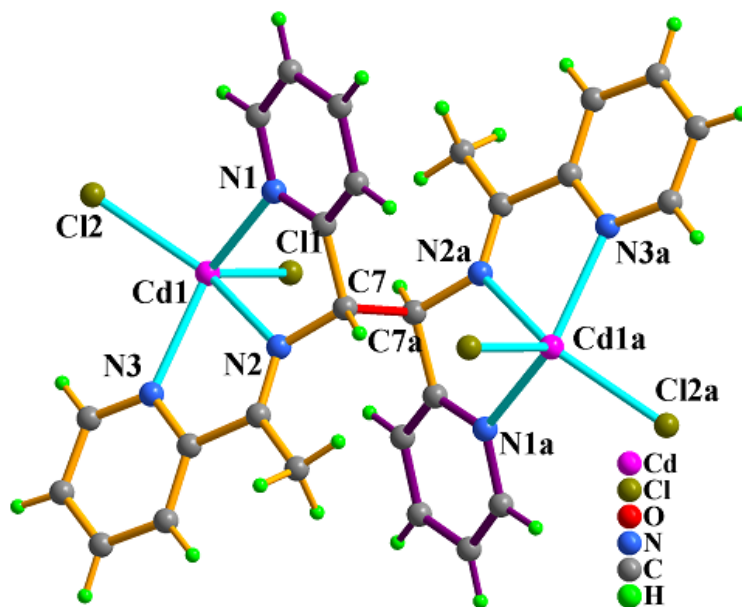

Figure S7

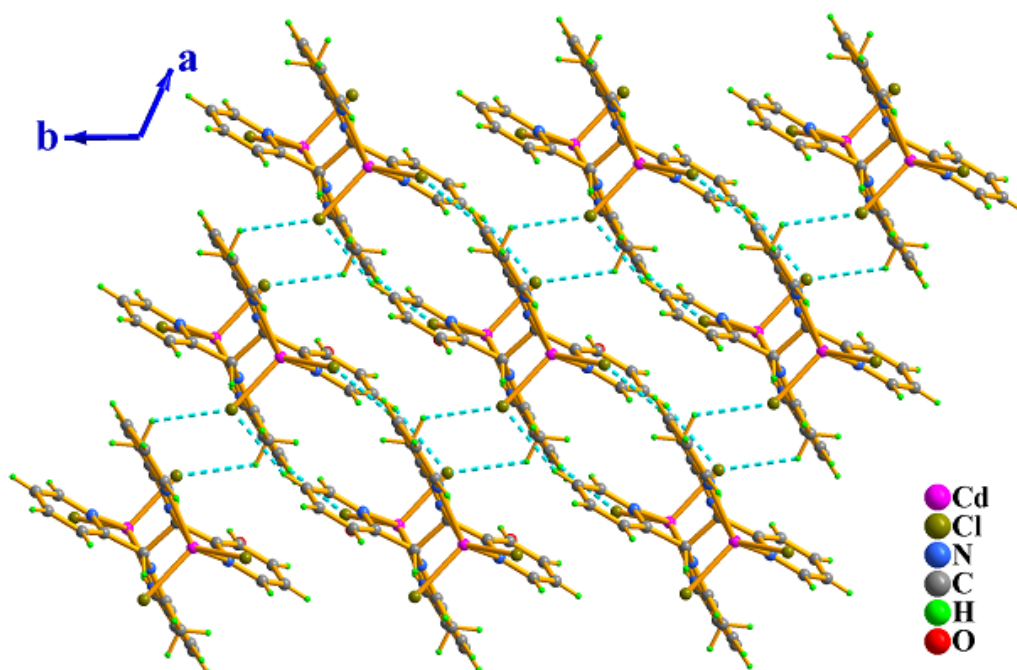

Figure S8

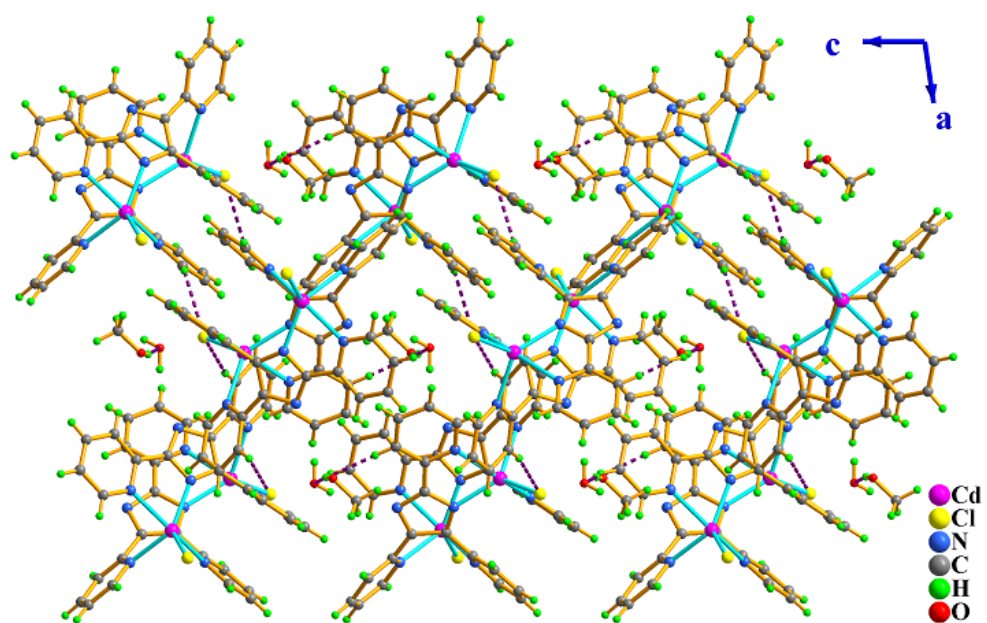

Figure S9

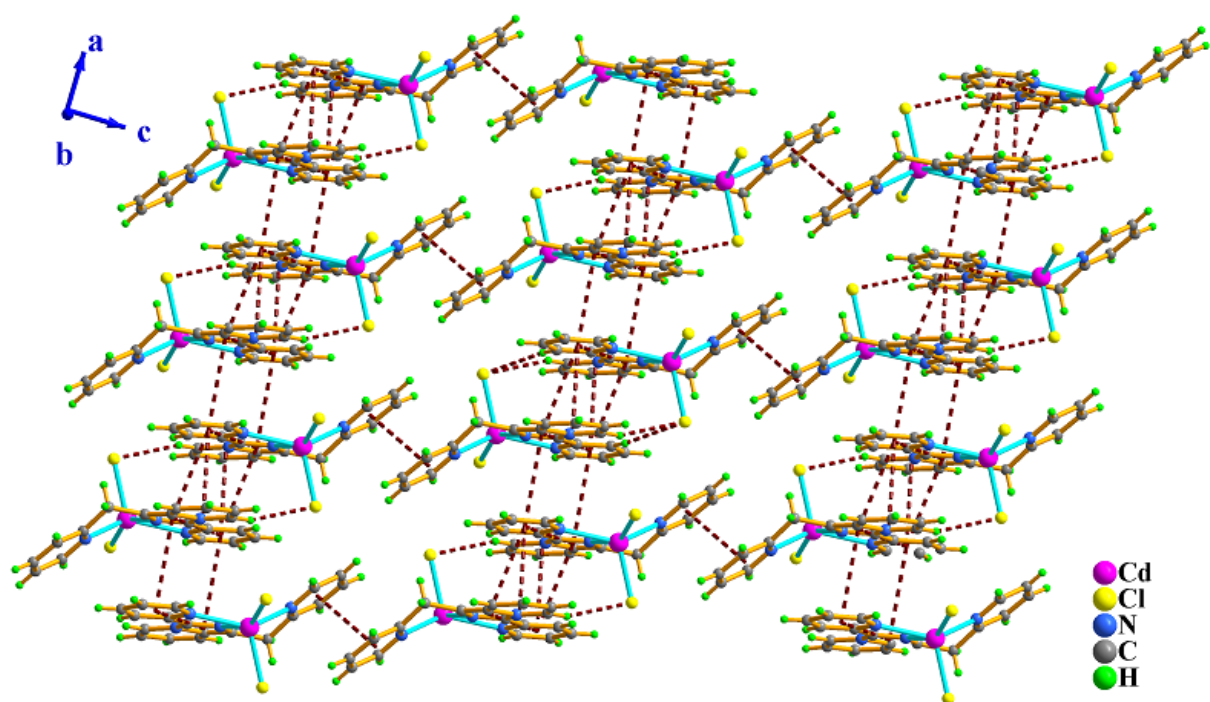



Figure S10

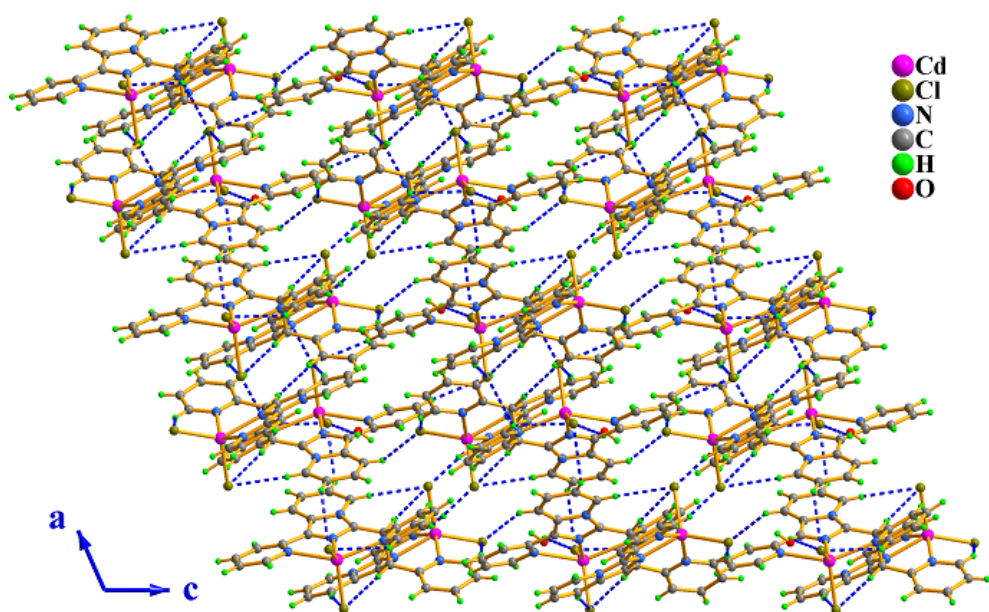

Figure S11

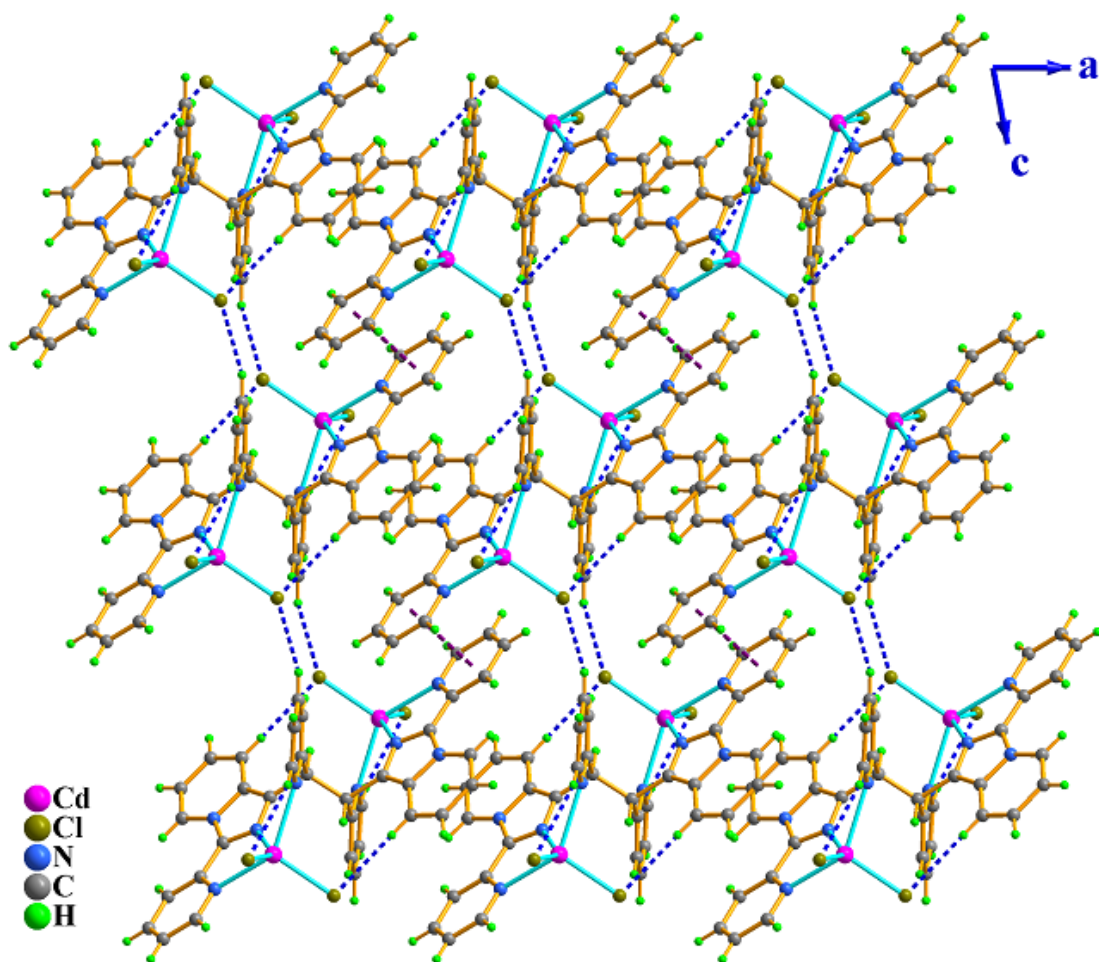

Figure S12

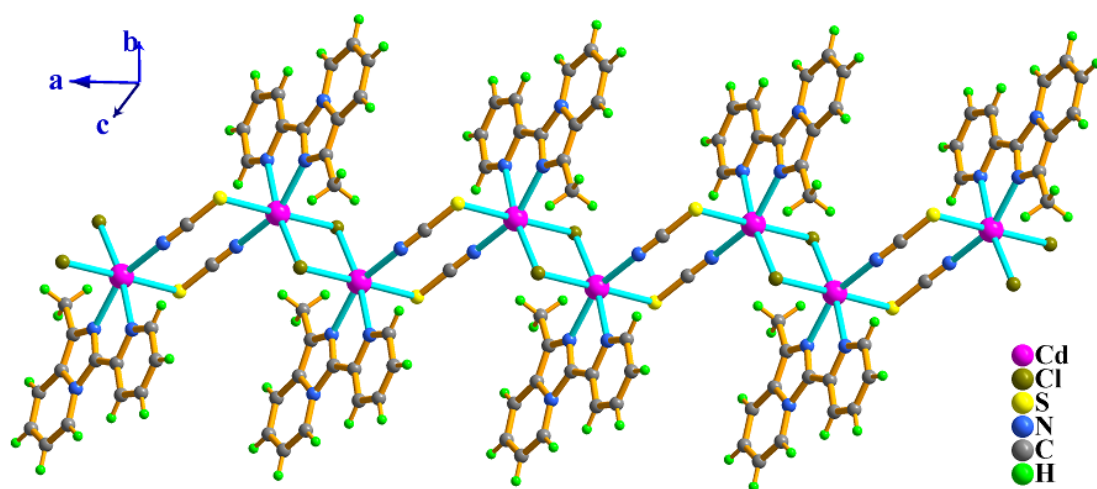

Figure S13

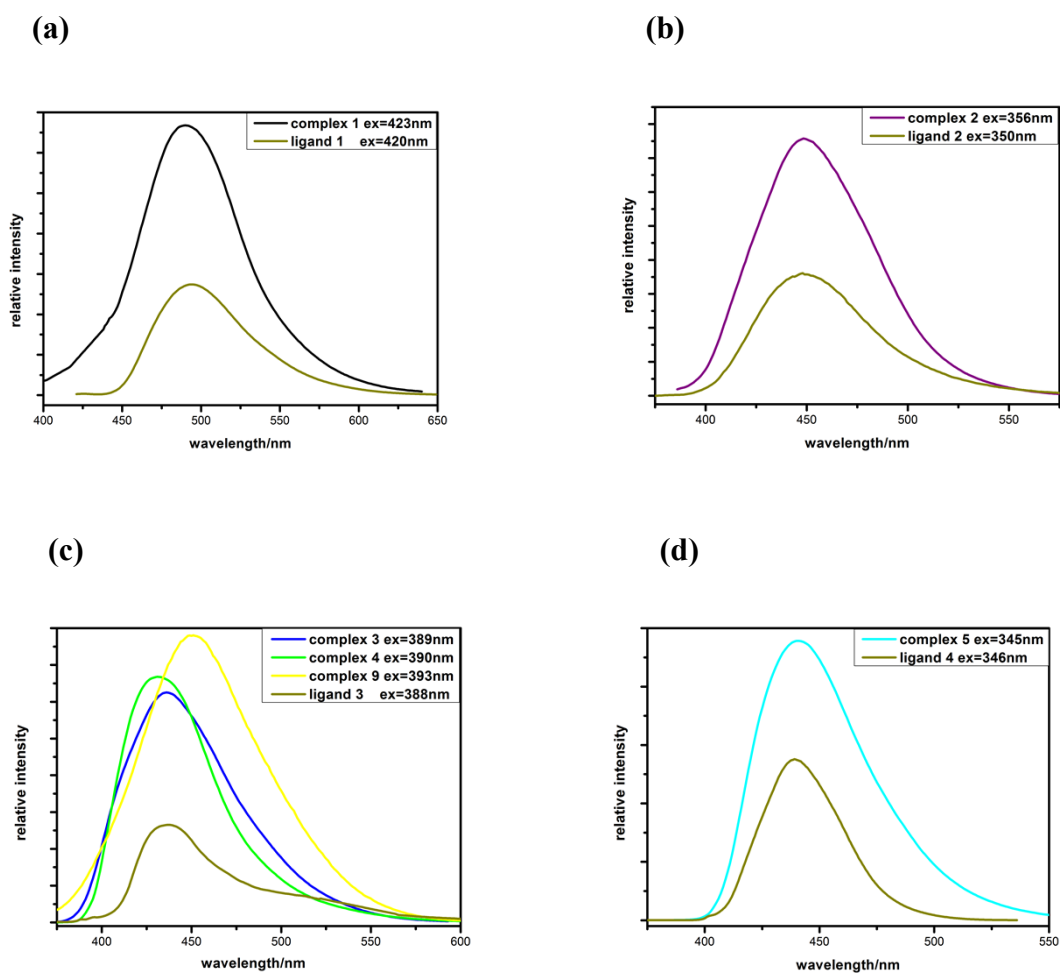

(e)

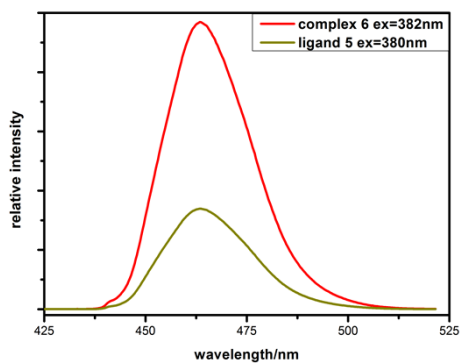

(f)

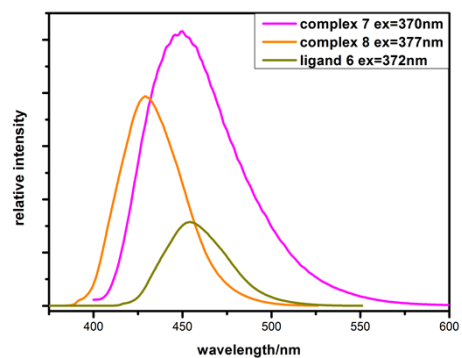

Figure S14

(a)

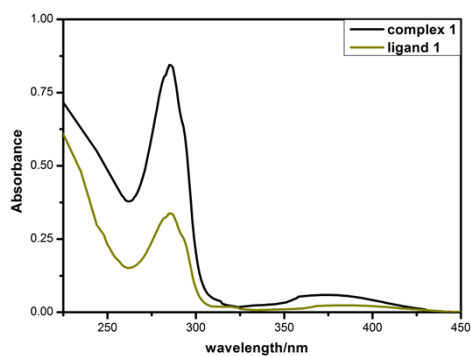

(b)

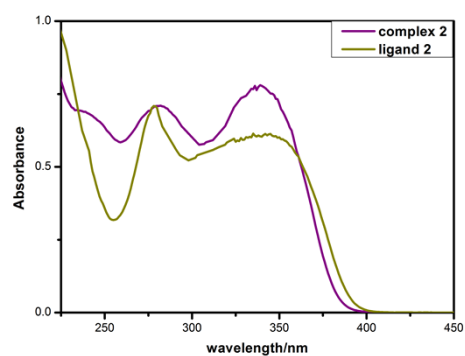

(b)

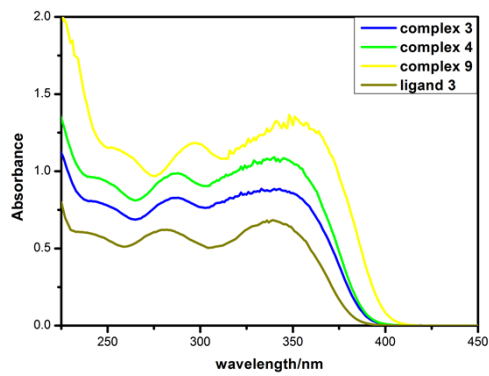

(d)

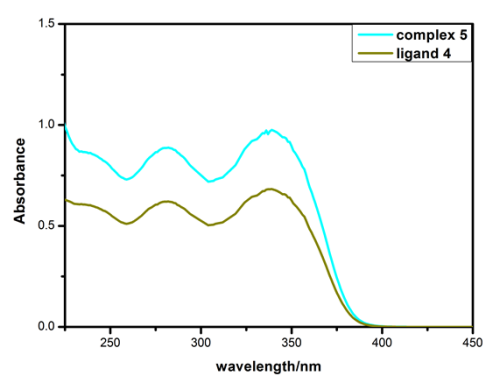

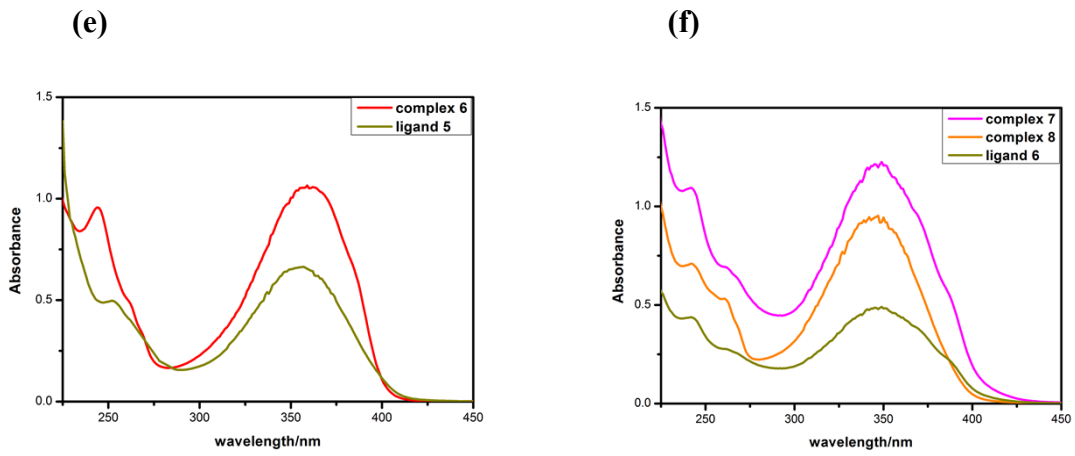

Figure S15

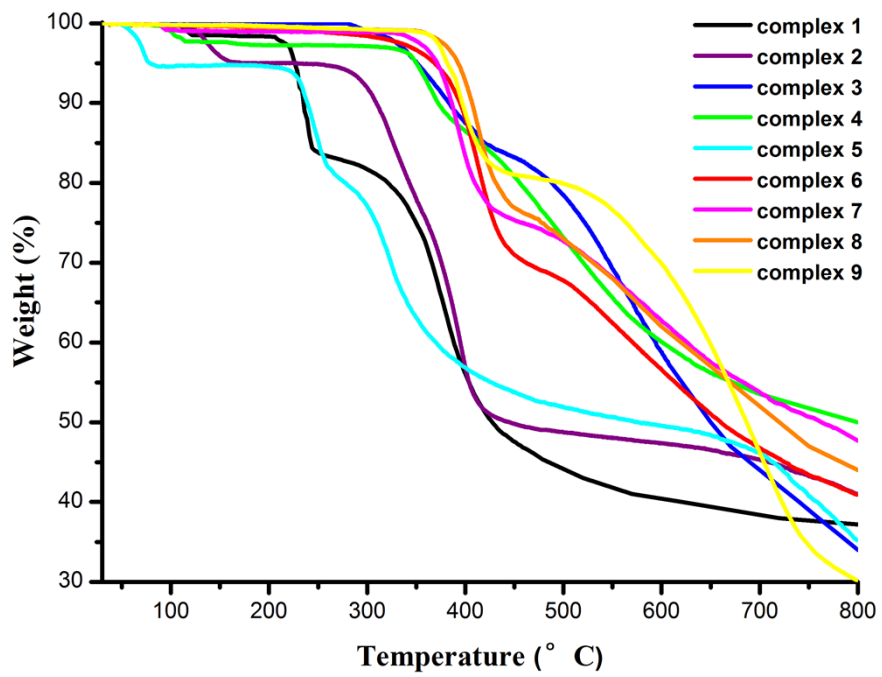

Figure S16

(a)

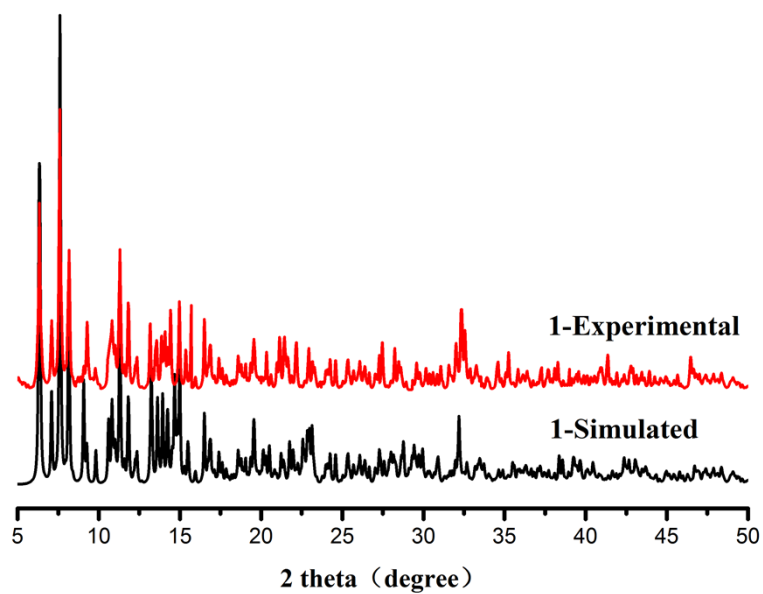

(b)

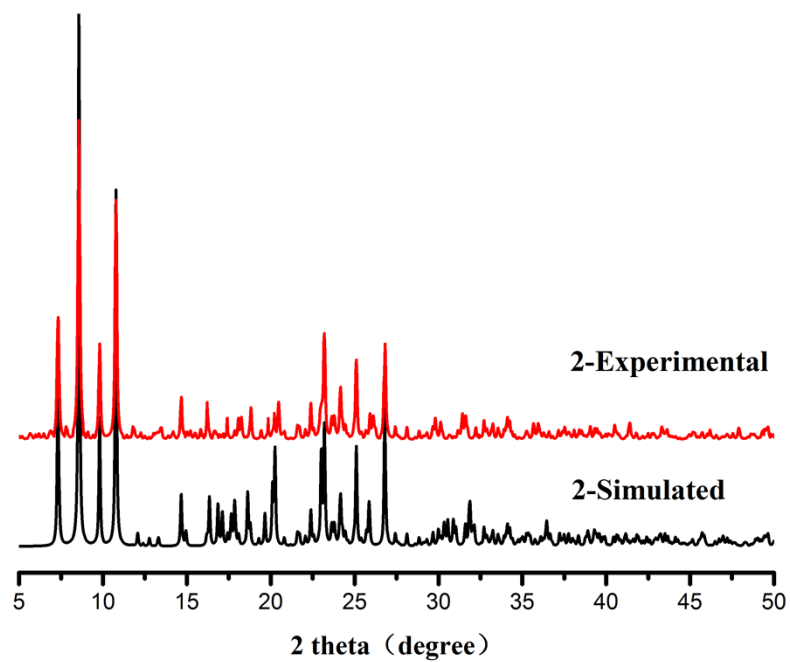

(c)

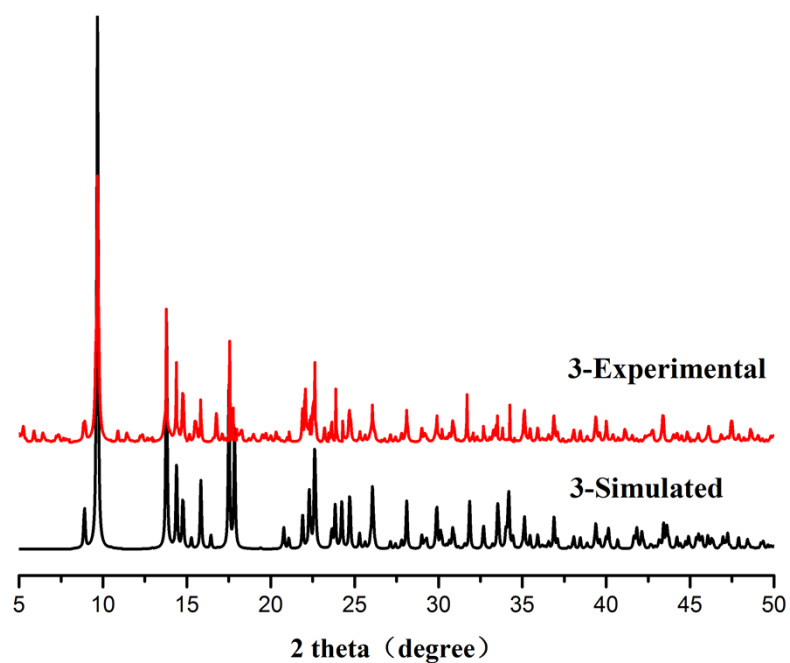

(d)

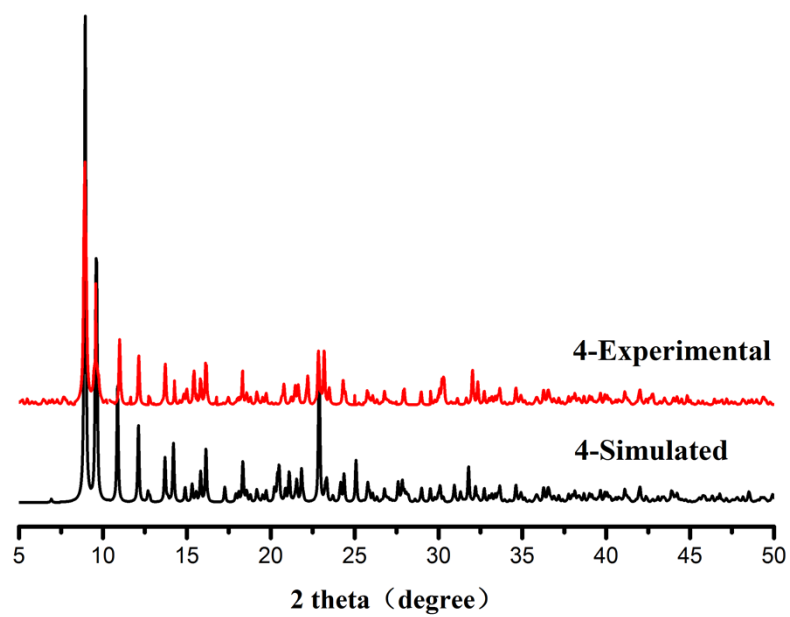

(e)

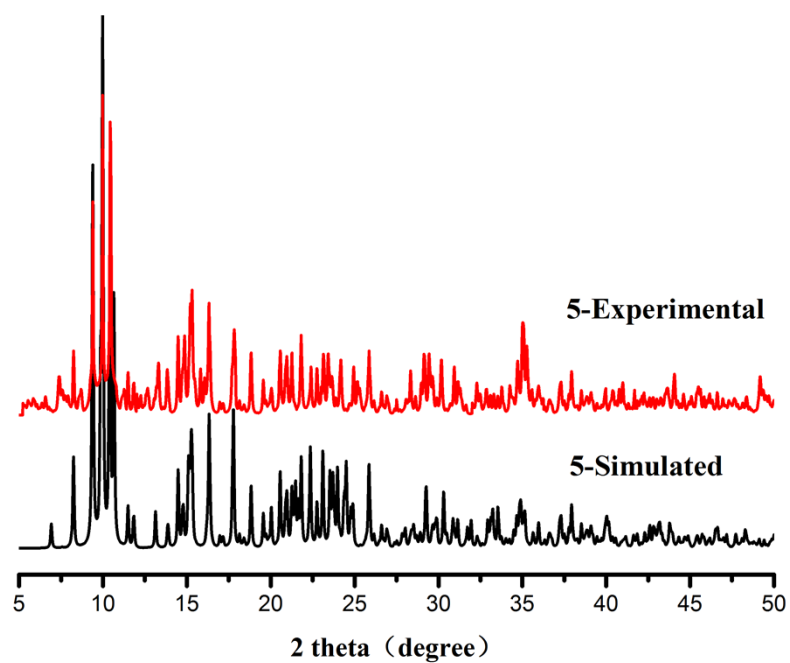

(f)

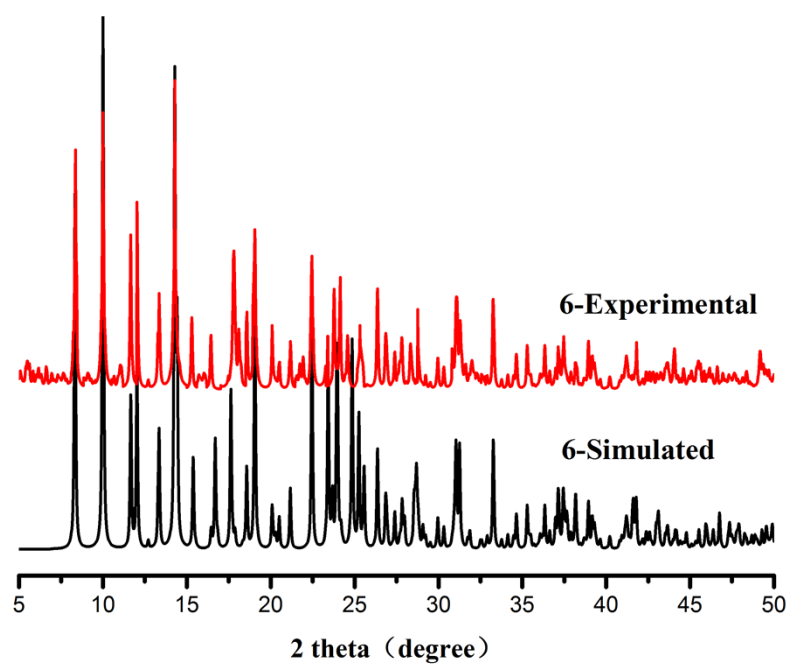

(g)

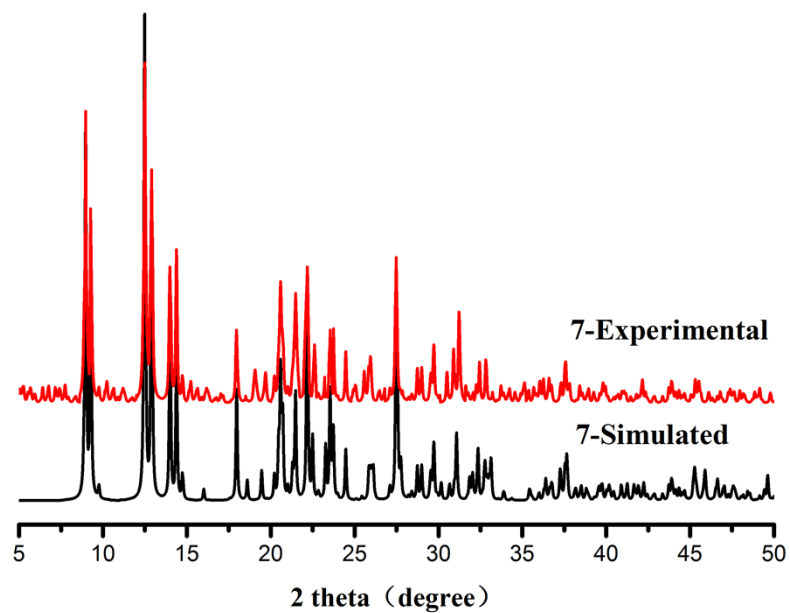

(h)

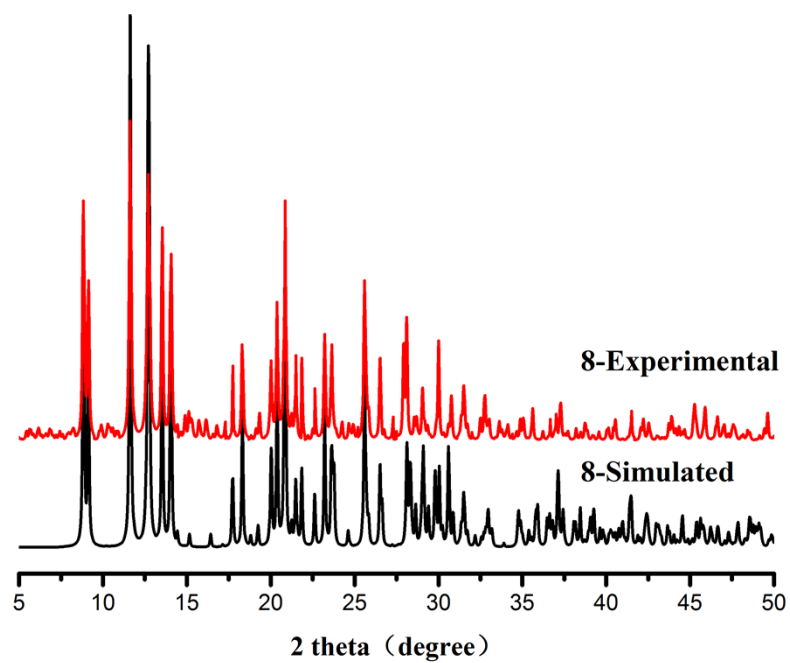



(i)

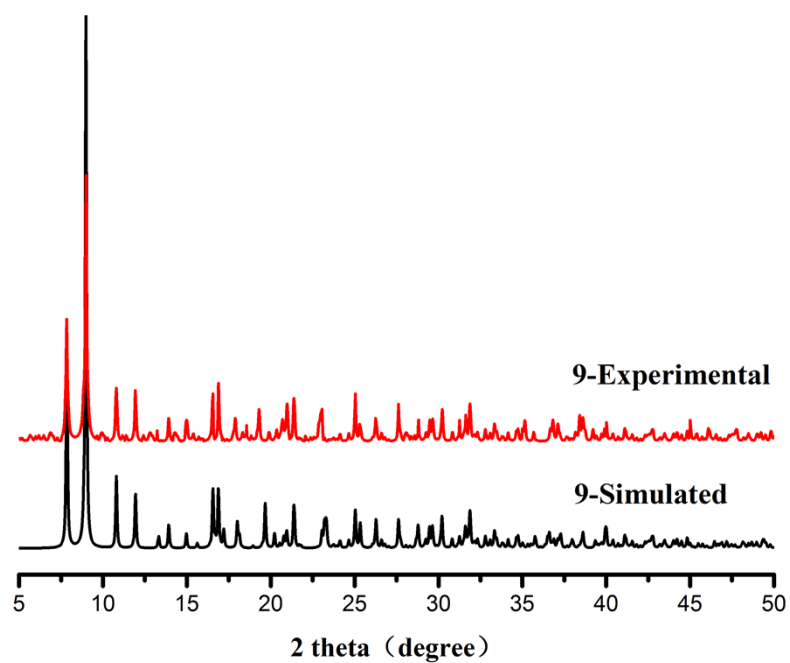

Figure S17  
(a) For compound 1

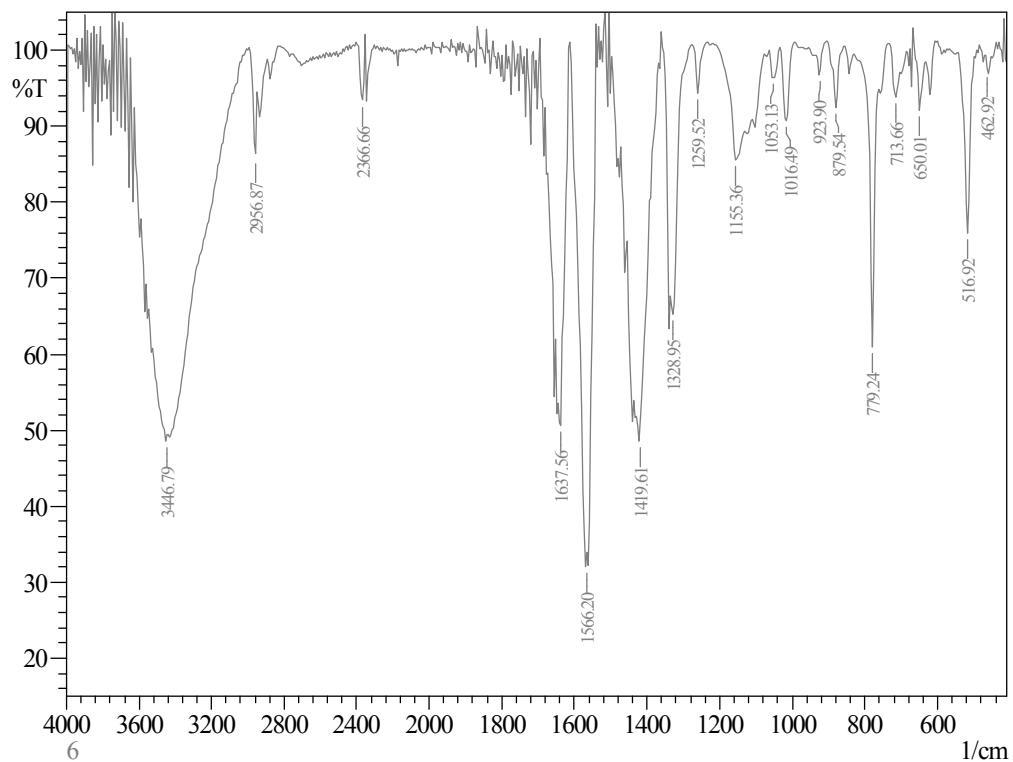

**(b) For compound 2**

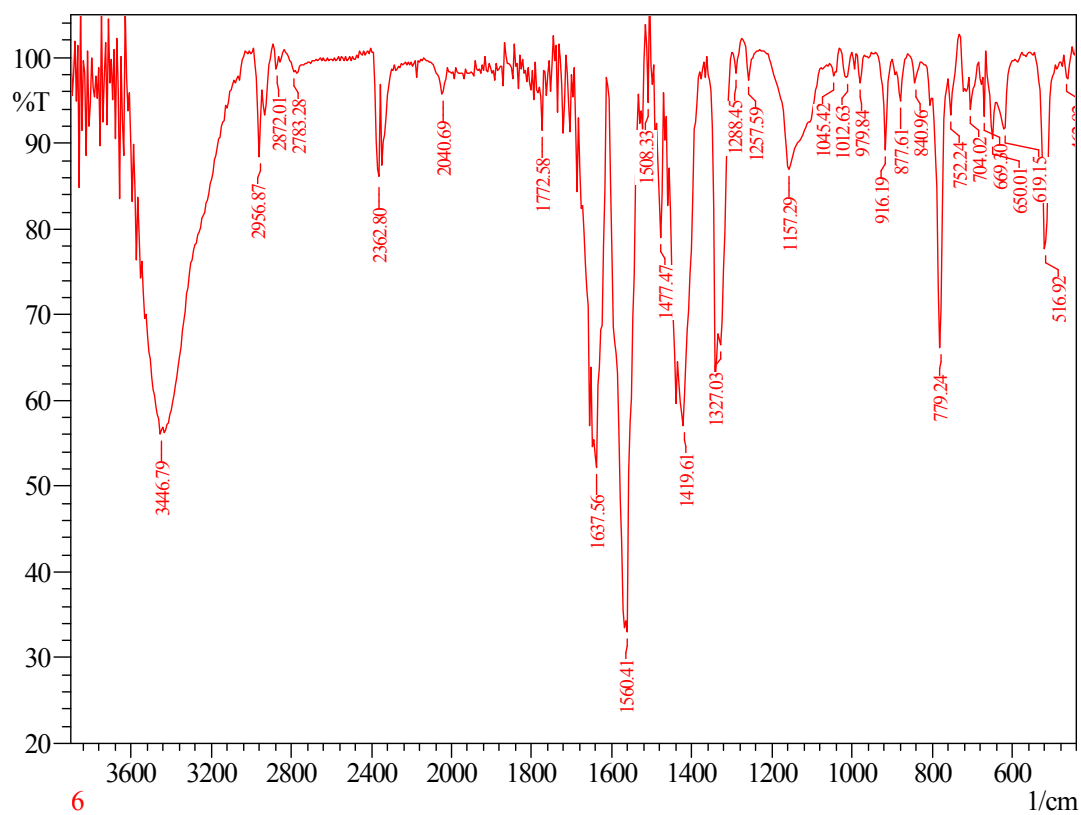

**(c) For compound 3**

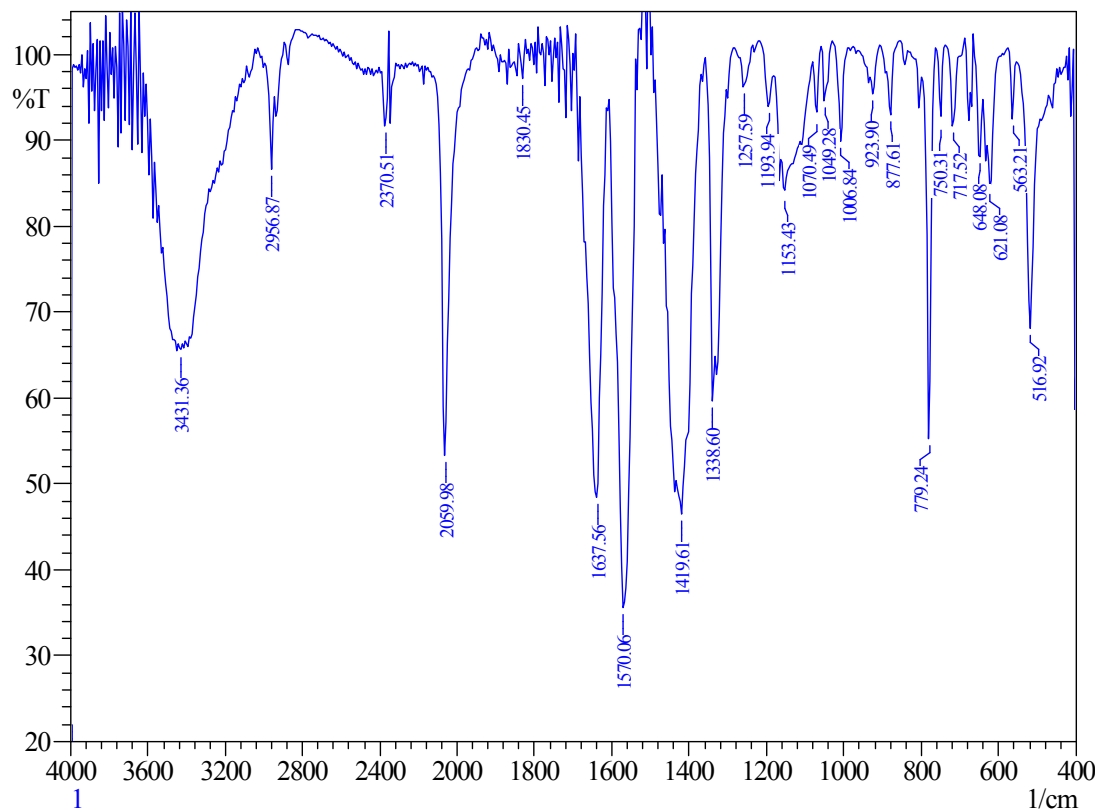

(d) For compound 4

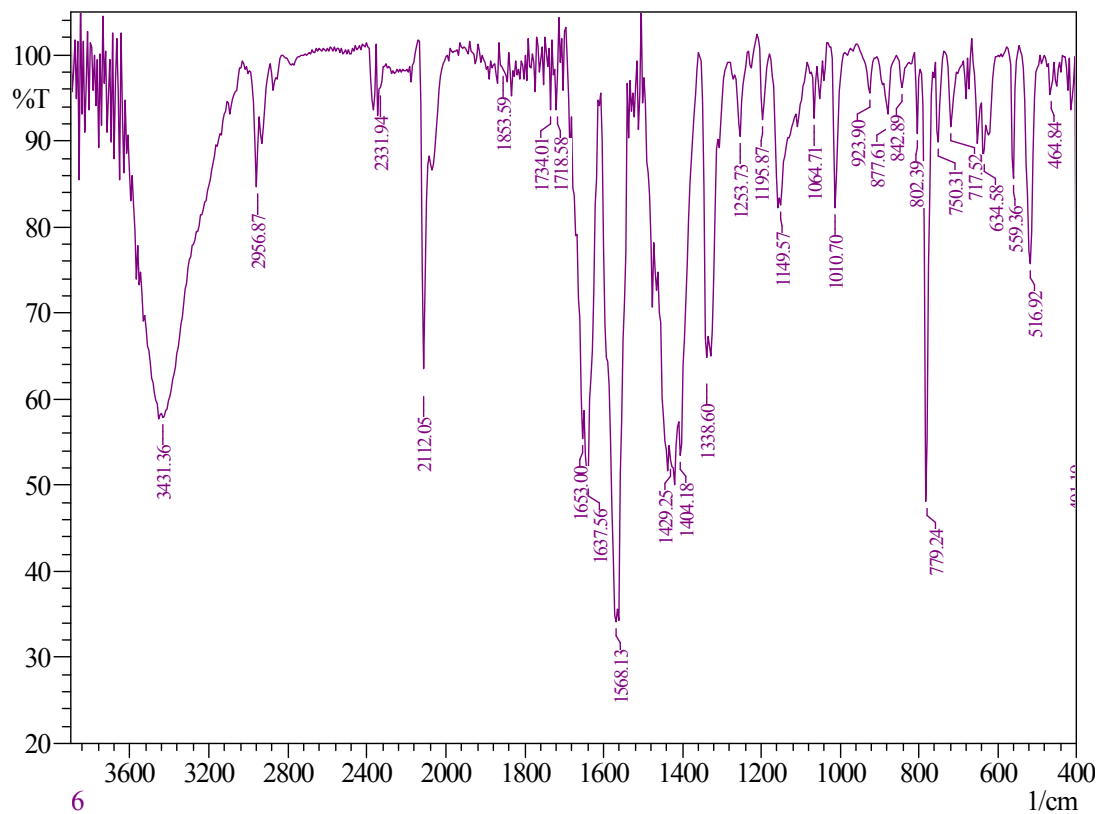

(e) For compound 5

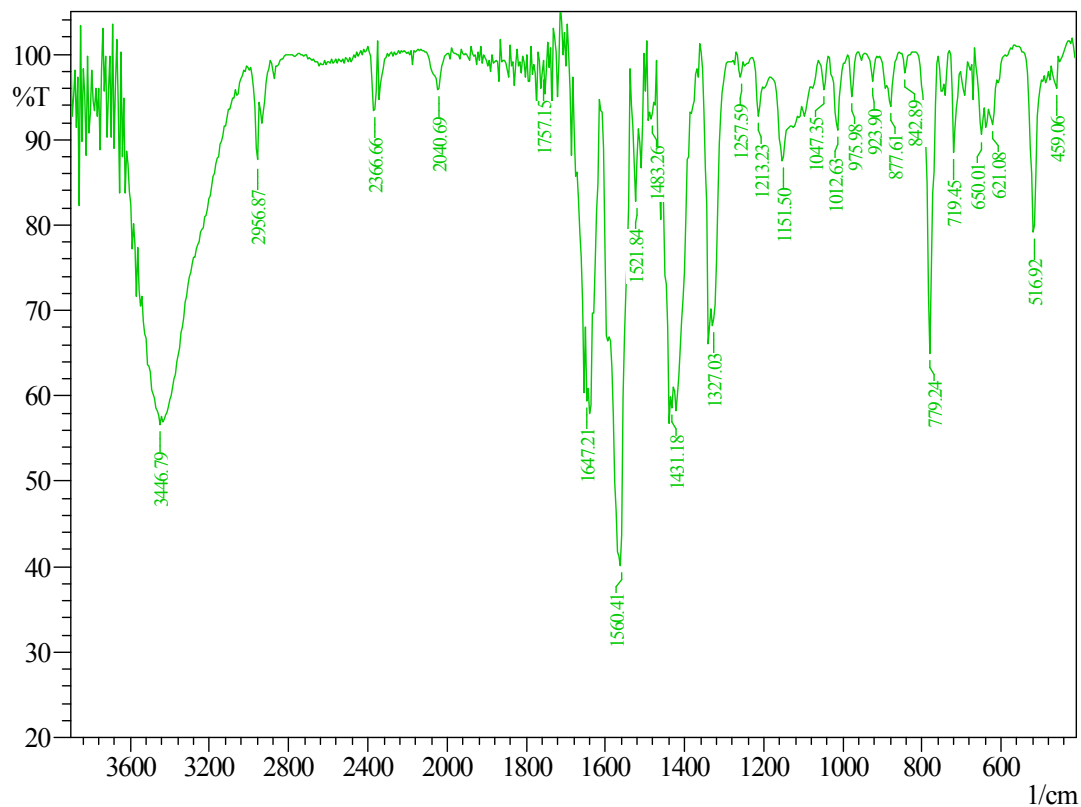

(f) For compound 6

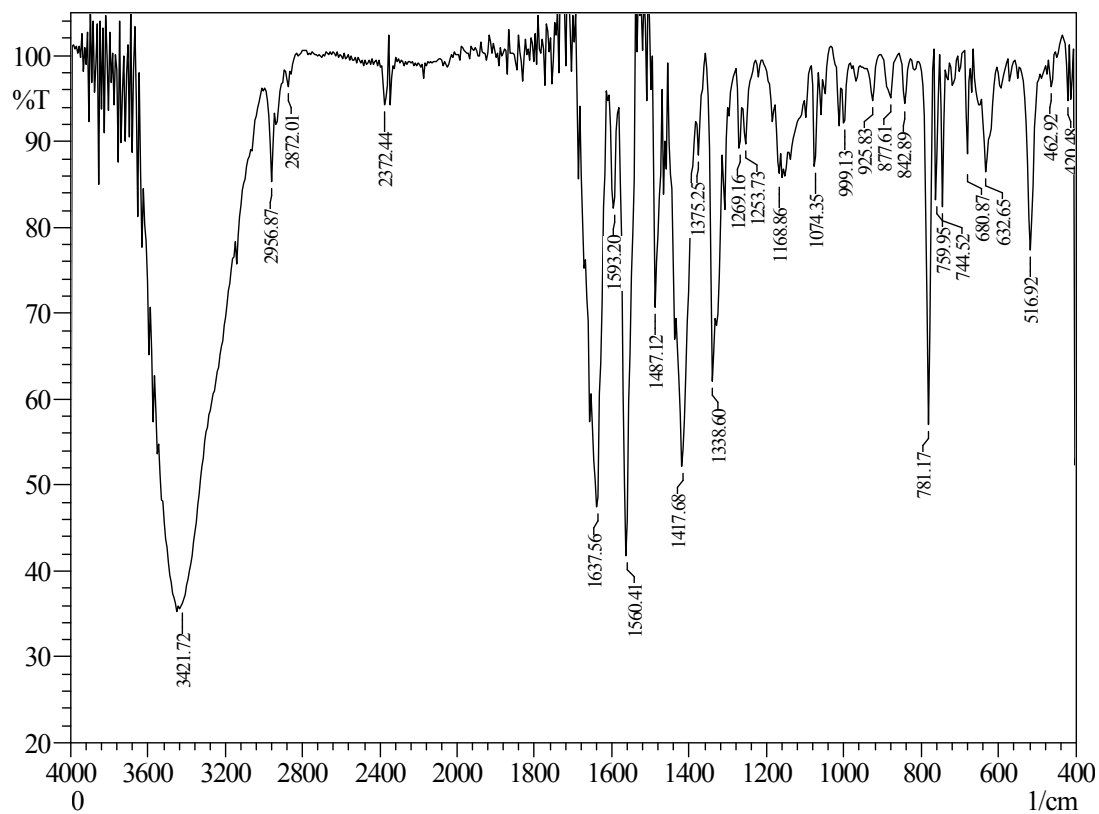

(g) For compound 7

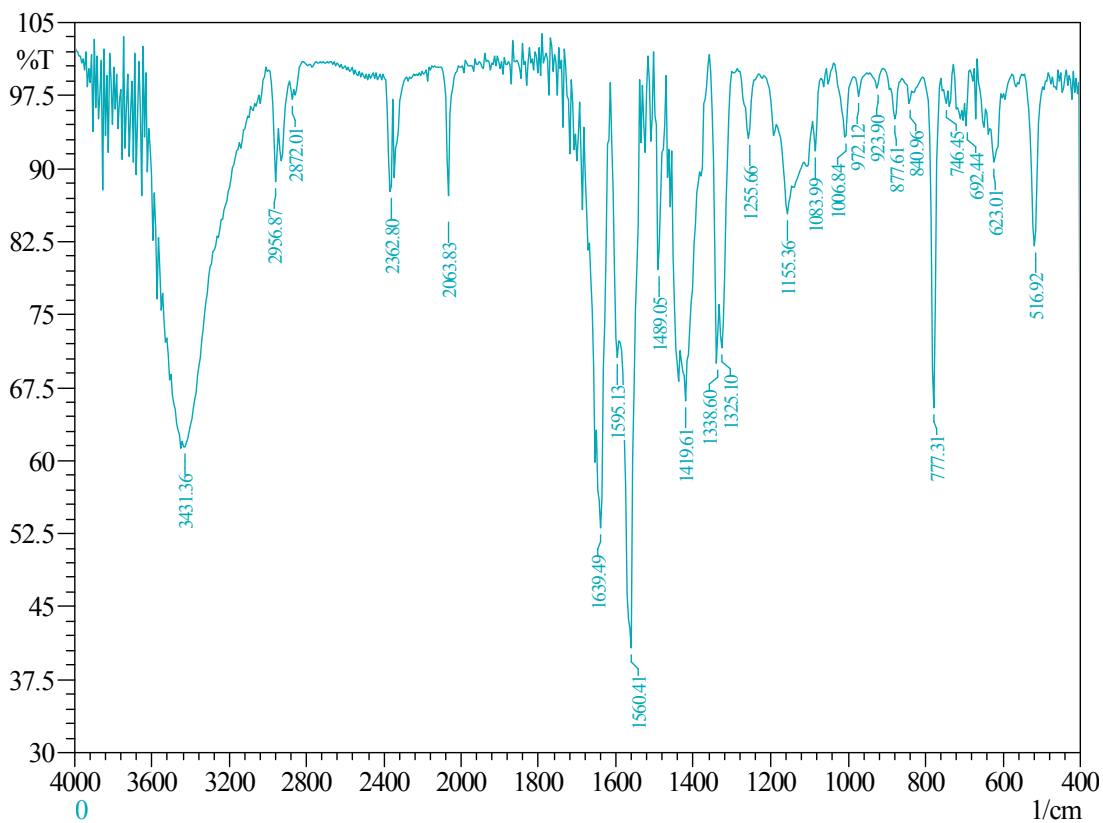

(h) For comound 8

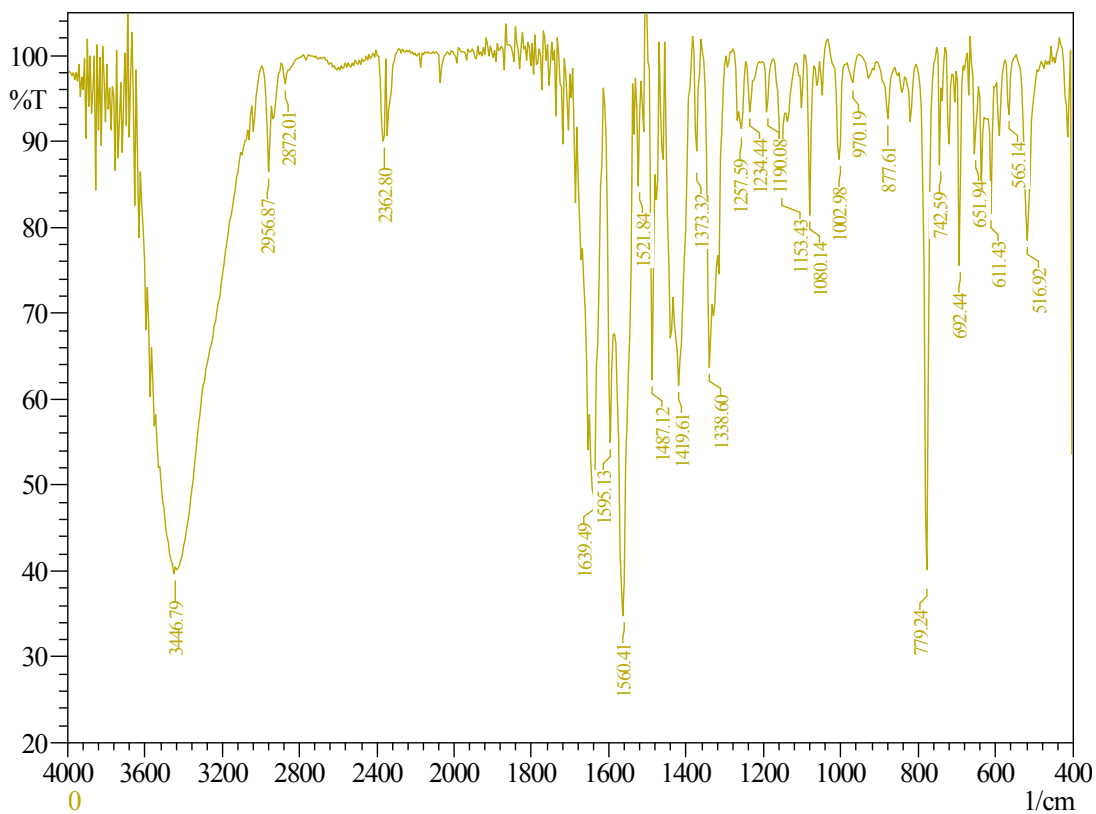

(i) For compound 9

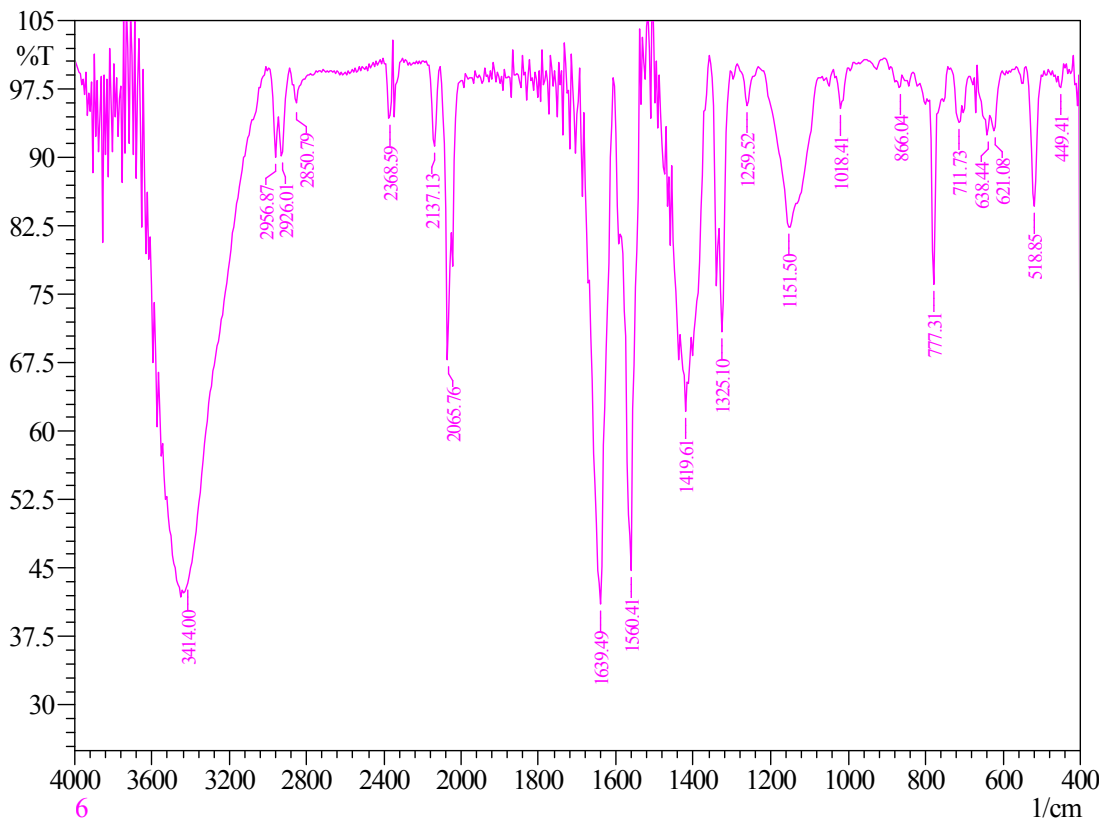

6
